# Supplementary material for: Comparison of the Cancer Gene Targeting and Biochemical Selectivities of All Targeted Kinase Inhibitors Approved for Clinical Use
Source: PLoS One. 2014 Mar 20;9(3):e92146. doi: 10.1371/journal.pone.0092146 (PMC3961306; doi:10.1371/journal.pone.0092146)
Supplement: Table S6 — Biochemical inhibition of more than 300 kinases by 25 kinase inhibitors (%-inhibition values at 1 μM concentration). (XLSX) [file pone.0092146.s014.xlsx]

## Sheet: legend
Uitdehaag et al. supplementary Table S6
Table S6
list of %-inhibition values measured in the 313 kinase panel. Kinase drug concentration was 1 micromolar
Data were generated at Carna Biosciences: www.carnabio.com

## Sheet: table_S6_kinase_panel_data
	Afatinib	Axitinib	Bosutinib	Cabozantinib	Crizotinib	Dabrafenib	Dasatinib	Erlotinib	Everolimus	Fasudil	Gefitinib	Imatinib	Lapatinib	Nilotinib	Pazopanib	Ponatinib	Regorafenib	Ruxolitinib	Sorafenib	Sunitinib	Temsirolimus	Tofacitinib	Trametinib	Vandetanib	Vemurafenib
ABL	16.0767	99.7458	100.424	55.8475	82.1186	29.7932	104.819	64.0562	-2.9661	-8.17669	34.3373	82.9317	16.8675	98.0825	54.9467	101.441	68.0508	5	46.3855	91.7379	-4.49153	-1.44068	-7.80075	98.5593	14.8305
ABL(E255K)	8.42627	94.7338	99.4792	25.4051	55.7292	24.145	101.452	44.1909	-2.83565	-3.01174	10.6846	37.6556	-4.66805	88.278	31.1937	101.331	33.3912	0.0578704	13.0705	84.6473	-2.83565	-3.76157	-2.60337	83.9699	2.48843
ABL(T315I)	15.8254	100.926	92.6955	76.0288	97.2222	42.5985	68.408	67.1642	1.33745	1.70394	19.6517	8.70647	8.95522	14.866	24.954	99.8971	65.7407	4.01235	53.2338	96.5766	-2.77778	5.45267	-2.34292	99.4856	6.68724
ACK	23.8994	2.07171	97.0518	30.4382	55.7769	24.1494	97.0223	37.0968	-4.62151	0.580913	47.0223	4.96278	2.35732	13.0081	13.3244	98.6454	-3.34661	93.3865	1.86104	48.5294	-7.6494	16.7331	-5.39419	23.5857	40.3187
AKT1	0.703606	0.315292	-5.46506	-4.51918	-6.83132	-0.776915	2.63473	12.2156	-7.14661	4.43951	3.35329	3.23353	2.63473	10.823	-1.95503	9.45875	-5.67525	-5.25486	17.6048	10.6729	-4.20389	-6.51603	-3.10766	-4.51918	-4.51918
AKT2	-0.462535	0.0504541	-2.57316	-3.78406	-2.67407	-9.83911	5.89496	8.25295	-3.78406	-8.2302	4.28725	3.85852	4.60879	12.474	-2.07852	7.11403	-3.98587	-3.68315	4.18006	9.35551	-1.76589	-3.27952	-7.98267	-1.76589	-2.97679
AKT3	0.503018	-1.61795	0.782881	-3.07933	-1.82672	-7.50873	4.91659	8.16506	-3.39248	5.87893	5.26778	4.30202	5.17998	1.58014	-0.112233	15.6054	-4.22756	1.93111	4.30202	16.9828	-1.72234	2.13987	-5.29686	-0.887265	-0.678497
ALK	16.4114	43.75	70.6317	48.9919	101.277	-1.9796	3.30251	35.1387	1.68011	-4.37912	11.3606	-0.792602	1.71731	-8.17391	48.1928	9.07258	-3.42742	68.75	2.11361	91.8619	-2.08333	0.873656	-2.81944	38.1048	1.14247
ALK(F1174L)	20.7843	39.6188	71.0688	6.53506	100.613	-6.18932	0	41.1679	-3.67597	-3.8835	7.0073	2.18978	1.60584	-45.1095	26.2363	4.76515	-7.48809	65.4867	1.89781	92.4088	-5.71818	-1.49762	-6.67476	31.45	-1.36147
ALK(L1196M)	17.5476	33.0946	100.614	4.24552	98.5678	4.12072	-1.39949	18.0662	-3.63171	-4.00464	2.4173	0.381679	-3.05344	-41.7303	25.0567	35.5499	0.358056	79.1304	4.07125	88.9313	-2.8133	3.73402	-3.42426	52.6343	3.1202
ALK(R1275Q)	8.20755	24.0024	61.3664	79.1415	100.665	-1.83342			-4.29262	-1.83342						44.9214	4.7763	49.0326			-1.39057	2.8416	-1.83342	31.1366	3.56711
AMPKα1/β1/γ1	-1.46082	67.9191	8.67052	-1.01156	16.474	32.4201	0	2.04313	-6.21387	-13.7454	5.67537	-5.67537	-4.76731	-11.655	-0.74813	45.9538	-0.722543	2.16763	8.17253	94.1358	-4.33526	-3.3237	-12.4539	8.95954	-1.5896
AMPKα2/β1/γ1	-0.688705	57.3034	10.2372	1.74782	26.5918	77.5839	2.13465	4.4335	-5.74282	4.96644	5.74713	-2.62726	-7.38916	-0.539568	0.826446	88.764	16.3546	7.49064	12.3153	89.2794	-3.87016	-3.37079	1.20805	4.74407	6.49189
ARG	10.1406	98.835	99.0291	29.3204	80.0971	54.1864	102.11	76.461	1.06796	-7.109	38.6364	67.6948	10.5519	95	67.1811	99.9029	34.5631	6.31068	25.974	74.7382	-1.5534	1.16505	-3.94945	93.5922	6.99029
AurA	-3.05011	99.6326	1.28598	53.5824	87.7526	79.9136	33.2317	28.8618	3.73546	-1.94384	8.63821	11.4837	5.58943	-5.43071	77.9221	8.87936	7.16473	27.2505	26.3211	81.4685	-11.5738	5.93999	-1.94384	8.14452	22.5964
AurA/TPX2	-5.39823	101.126	4.25532	29.37	89.7789	75.9738	21.9796	1.4556	-4.50563	-1.10701	-6.9869	10.3348	-10.3348	-9.31587	69.5817	-3.42094	-4.00501	63.496	-2.47453	71.9068	-3.42094	58.0726	-5.37105	1.50188	-2.58657
AurB	7.6179	98.8636	2.39899	88.8889	90.404	39.1493	15.0538	24.9793	-1.38889	0.954861	4.79735	3.55666	8.76758	-11.1288	45.0593	46.0859	20.202	24.1162	26.7163	70.2922	-3.91414	-5.30303	-3.90625	23.1061	5.80808
AurC	-3.00903	98.5761	-3.81877	85.5016	86.6667	22.7496	14.5019	24.0858	-6.40777	-0.163666	12.9887	12.9887	3.40479	5.24476	57.7932	18.9644	22.0712	47.8317	54.2245	82.4897	0.194175	-4.20712	0.981997	3.68932	13.3981
AXL	15.0965	81.6387	86.1797	100.099	101.283	30.3696	10.5134	17.7262	-1.67818	2.62453	25.3056	5.25672	18.8264	-4.75436	24.3461	70.4837	28.8253	11.846	19.3154	97.8261	-1.7769	2.9615	-1.1248	78.4798	19.6446
BLK	46.8333	38.8128	84.2922	99.6347	47.032	80.4954	103.001	30.6122	-7.03196	-2.47678	42.617	23.4094	24.1297	29.0237	62.2099	97.0776	24.9315	-1.00457	19.4478	95.8333	-12.3288	-3.56164	-2.78638	89.2237	52.1461
BMPR1A	17.9634	1.90678	1.73665	2.26952	41.0407	17.2283	58.518	11.8029	-3.21007	-10.336	14.0565	6.5699	7.37204	-21.9502	-1.69811	6.48112	-4.64818	5.70429	8.21238	10.7235	-9.44081	-1.56651	2.13761	45.5155	8.85336
BMX	5.66449	16.4498	91.5428	52.881	38.9405	55.2542	100.492	16.8852	-5.2974	-3.89831	9.83607	2.29508	9.18033	-1.25786	23.8011	101.022	-1.7658	6.59851	-3.44262	20	-7.15613	2.88104	-3.22034	17.7509	23.8848
BRAF	13.53	6.35648	16.0095	25.2438	12.4513	99.3701	90.7001	13.6592	-6.54485	-3.27927	15.8256	23.0647	11.6248	40.6692	80.0197	89.0347	90.6714	13.5481	82.4306	-2.52139	-3.3551	6.51137	78.1778	24.3062	98.6793
BRAF(V600E)	7.90292	-0.193606	7.94039	37.3073	10.2815	98.8561	79.2946	8.25726	1.92587	3.35837	0.248963	1.57676	1.07884	50.9385	38.0806	84.3077	76.859	5.83875	76.9295	-10.24	-0.863584	1.07757	37.0694	17.501	68.0015
BRK	25.6894	23.9004	35.3527	100.581	14.6058	98.2358	98.6737	46.6844	-4.31535	-6.01443	52.3431	11.4943	62.5111	74.5993	69.9339	97.2614	19.917	-4.14938	14.2352	63.0322	-5.9751	-6.30705	-5.53328	99.917	97.9253
BRSK1	-0.556586	81.7673	-11.2975	3.24385	12.4161	36.6702	4.37158	5.68306	-9.28412	-0.210748	9.61749	1.31148	2.0765	0.801068	-1.05402	-7.71812	-17.1141	-6.37584	2.0765	86.9969	-13.5347	-2.57271	-5.90095	-9.0604	-8.38926
BRSK2	7.74059	71.6037	-11.951	5.61798	8.27375	29.744	6.99659	3.75427	-0.919305	5.73698	8.36177	4.43686	3.58362	-0.27027	-2.17707	-10.5209	-15.4239	-11.5424	5.9727	87.146	-9.09091	-0.510725	5.38394	-9.70378	-6.02656
BTK	6.70315	-0.510678	96.7038	92.5255	4.5961	60	101.648	5.49451	1.16063	1.51394	10.3022	-0.549451	2.47253	45.3216	12.6428	94.9396	2.55339	-5.89601	32.6923	46.2886	17.688	-5.71031	17.7689	81.4763	2.08914
CaMK1α	2.42718	-6.93312	9.05383	-0.897227	0.734095	62.6327	1.38191	2.51256	-8.07504	-5.4494	2.01005	7.03518	8.29146	-15.3333	5.58882	18.3524	-6.11746	6.28059	12.1859	27.5466	-6.60685	1.06036	-2.05237	-3.01794	-3.18108
CaMK1δ	1.34855	-12.3068	96.3734	-1.36742	-4.10226	35.3383	-3.17298	-3.68475	-8.26397	-3.99075	-1.74002	-6.85773	-4.19652	3.56394	-1.49254	-4.34007	-5.29132	51.4269	0	42.4977	-7.19382	2.55648	-3.2967	-3.0321	-7.07491
CaMK2α	0.278293	-5.73278	1.84928	-7.76699	-2.77393	-2.14008	-2.77502	-1.98216	-8.04438	-0.680934	0.792864	-2.67592	-4.55897	-5.08772	-0.796813	-5.64031	-1.57189	41.5164	-3.86521	70.4612	-6.93481	-2.589	-1.6537	-4.9006	-4.25335
CaMK2β	-0.102987	-5.87589	-3.23998	-4.00879	-1.59253	-0.276625	-6.13682	-5.73441	-9.71993	2.58183	-4.82897	-6.43863	-4.82897	-21.0262	-2.28519	-1.37287	-9.17079	21.911	-4.22535	39.6378	-9.39044	-6.42504	0.737667	-4.22845	-6.6447
CaMK2γ	2.81215	-9.94825	7.87809	-7.87809	-10.2933	-5.46838	-3.57143	2.95918	-15.6987	-3.37613	14.0816	-6.42857	1.73469	-2.7551	0.187793	-3.9678	-13.1685	56.0667	2.65306	96.7347	-13.5135	-8.68315	7.18022	-12.5934	-10.4083
CaMK2δ	9.82587	11.4185	52.5015	0.94173	4.00235	-0.230415	-7.61155	-11.0236	-2.11889	3.45622	-16.273	-16.7979	-32.8084	1.20482	1.53846	1.88346	1.53031	80.9888	-15.2231	83.0403	-3.88464	15.6563	-2.18894	9.65274	-0.235433
CaMK4	-3.21244	-5.87949	-3.06122	-9.5724	-1.40914	78.3598	-5.82255	2.03327	-10.9329	-5.66138	-3.41959	-1.57116	-4.43623	3.53866	-1.08225	-1.50632	-0.0485909	-2.57532	-6.37708	26.2881	-9.37804	-3.54713	-5.44974	-2.96404	-2.38095
CDC2/CycB1	-2.55255	5.18519	-1.37566	-16.6138	18.9418	26.0606	4.43656	6.03372	-19.1534	6.46465	5.4126	1.77462	0.354925	0.98401	2.997	33.3333	0.529101	0.10582	8.60692	10.6358	-23.3862	-1.16402	8.08081	-0.952381	9.84127
CDC7/ASK	-5.7377	-6.79739	-5.35948	-3.39869	-5.4902	-5.75307	2.90587	0.905454	-6.14379	-6.91661	3.81133	2.08465	2.86376	-7.05993	-3.45865	-7.45098	-5.35948	5.35948	-0.421141	1.15751	-5.88235	-4.05229	-7.95087	-6.40523	-7.18954
CDK2/CycA2	-3.48432	14.7561	-9.95935	-8.90244	3.13008	27.7555	4.82094	10.1928	-10.7724	22.3447	4.82094	2.61708	1.37741	-0.28169	-5.04202	-8.73984	-12.3171	2.47967	0.550964	11.677	-8.41463	-5.4878	23.5471	-7.84553	-2.88618
CDK2/CycE1	-4.19355	-10.2026	-20.8552	5.10128	-13.6534	24.4305	12.2682	-2.42511	-14.2536	12.8044	-4.94572	-5.70613	-2.56776	19.9715	-0.506971	9.15229	-2.70068	-12.3031	0.570613	-0.713267	-1.35034	-8.25206	2.5923	-21.4554	-4.95124
CDK3/CycE1	-3.72093	-10.0167	1.00167	-2.83806	-5.67613	23.8591	2.27273	6.81818	-4.50751	24.4996	3.125	2.84091	2.84091	-1.59652	0.931315	19.6995	-1.16861	-9.51586	0.852273	10.8262	-6.17696	-10.1836	0.160128	-12.5209	-4.34057
CDK4/CycD3	2.4	-5	-7.3913	-4.78261	6.95652	23.1824	2.79503	1.86335	-9.34783	-2.33196	1.75983	3.31263	1.34576	-3.99334	15.7385	23.6957	6.52174	-1.73913	4.7619	15.2838	-2.82609	-4.78261	5.62414	-8.69565	-3.26087
CDK5/p25	-2.24138	-2.19048	-24.6667	-14.1905	-7.71429	21.7047	4.63243	8.35851	-26.381	17.4868	2.1148	0.906344	0.20141	0.830368	9.45822	-20.4762	-18.5714	-15.7143	-5.43807	17.5481	-22	-14.5714	18.717	-25.0476	5.2381
CDK6/CycD3	0.945626	-0.810979	0.062383	0.311915	0.062383	64.5076	8.5736	8.72534	-2.932	-5.68407	8.64947	5.53869	5.08346	-22.813	9.0036	25.0156	-1.31004	-6.17592	13.2777	56.2044	-3.18153	-1.55958	-4.23001	-1.18528	2.43294
CDK7/CycH/MAT1	-3.78038	-3.80385	-4.3538	-9.85335	58.1577	-5.05381	2.78261	1.21739	-6.18698	7.48713	5.04348	2.17391	1.91304	-2.33918	9.31677	8.8451	-3.07058	3.2539	-2.6087	105.654	-8.29514	-6.46196	-6.08329	-4.26214	0.137489
CDK9/CycT1	-3.30969	-1.79087	-4.21722	-5.37262	5.14154	-2.18887	-0.250313	2.62829	-3.98614	25.8286	0.250313	2.75344	0.500626	8.83797	30.7432	15.5402	0.982091	-3.29289	1.75219	6.82927	-3.29289	-2.13749	-2.31395	-1.55979	1.32871
CGK2	-0.305188	5.34682	-0.529865	-2.55299	-0.915222	-1.38107	-6.07533	-1.70109	-4.57611	46.3939	9.47752	-2.55164	-8.74848	12.1951	-0.962567	12.1869	-1.78227	32.1291	-2.79465	32.3177	-2.842	4.67245	-2.6087	-2.64933	-2.26397
CHK1	-7.96253	-67.9809	83.2736	4.42055	10.3943	-0.719424	10.9339	13.8952	4.1816	-11.3669	17.426	9.5672	11.7312	-15.1405	-6.69856	3.22581	-2.98686	4.6595	1.93622	96.6009	4.42055	0.83632	-0.719424	27.1207	4.1816
CHK2	18.0556	14.9425	86.7816	64.5594	9.38697	6.98723	4.00471	9.65842	-36.7816	3.83171	27.3263	5.65371	11.6608	-12.406	5.69948	95.5939	-2.10728	3.63985	3.65135	98.6111	-3.44828	7.08812	-5.18407	56.705	6.32184
CK1α	-1.92837	-8.30235	64.5601	-9.29368	-1.36307	12.8137	-8.43707	10.3734	-11.0285	2.77411	16.5975	9.12863	3.59613	2.00927	-3.96476	8.05452	-7.55886	1.85874	10.0968	64.8611	-13.5068	-9.54151	3.03831	-3.59356	-4.33705
CK1γ1	-5.65553	-0.270636	13.6671	4.73613	-3.51827	3.3052	-1.77384	2.21729	-2.43572	-3.02391	2.32816	-5.43237	-8.53659	-1.00604	-2.88625	-4.19486	-7.71313	-4.05954	-11.8625	93.0468	-4.46549	-3.24763	0.21097	-4.73613	-2.02977
CK1γ2	-5.38058	8.37549	-2.30467	0.730748	1.40528	0.306748	20.1361	7.61905	-2.30467	18.0982	26.2585	8.84354	-1.22449	5.56995	-0.747198	0.168634	-2.9792	-0.393479	4.21769	66.6252	-3.31647	-3.76616	-2.14724	-2.07982	0.505902
CK1γ3	-8.0292	7.18912	3.30311	5.11658	3.95078	3.01887	-3.45324	-0.719424	-12.6295	-4.07547	-2.30216	4.31655	-0.863309	-9.64029	-2.03837	4.59845	-2.13731	4.59845	-1.29496	52.518	-0.971503	1.7487	2.22045e-14	2.65544	2.13731
CK1δ	-10.7471	-0.180397	96.9934	0.0601323	9.32051	8.51064	-7.66017	-4.17827	-4.26939	-3.40426	-5.84958	0	-3.34262	-16.7131	1.13493	3.30728	-6.31389	11.8461	-4.17827	31.8942	-5.47204	2.94648	0.364742	6.31389	-3.06675
CK1ε	0.142653	-1.23119	95.0752	3.28317	4.10397	9.81013	-3.57143	-2.38095	-6.42955	-4.62025	-5.95238	-3.125	1.6369	0.595238	0	3.96717	-5.74555	7.38714	0.595238	45.0893	-6.70315	3.69357	-5.37975	7.11354	2.46238
CK2α1/β	-6.60502	-5.89342	-8.15047	-2.75862	-6.39498	-0.0641026	-1.69972	0	-4.26332	-4.03846	-1.13314	-1.13314	-1.69972	3.22581	-3.09406	-5.26646	-9.40439	-6.01881	0	-21.0526	-6.64577	-6.64577	-3.39744	-7.14734	-5.39185
CK2α2/β	-4.48598	-7.46812	-8.01457	8.74317	-10.2004	-5.86538	-4.66531	-5.47667	-1.27505	-3.75	-4.25963	-3.85396	-3.44828	-4.25963	0.170358	-5.10018	-5.46448	-7.10383	-7.30223	25.355	-5.28233	-7.10383	-5.28846	-7.10383	-6.55738
CLK1	14.2857	-4.54545	67.232	7.25916	13.0936	7.04574	5.48204	20.794	-7.39484	32.0148	23.0624	36.862	14.3667	81.0897	7.57143	94.2334	38.0597	33.4464	19.4707	100.705	1.28901	-1.42469	-0.618047	13.9077	4.81682
CLK2	2.61324	-3.71009	-0.431406	-5.26316	-5.78085	0.875274	-1.02828	7.96915	-17.17	-0.291758	-7.19794	6.6838	3.59897	1.71429	0.914077	-3.36497	-23.5548	14.5815	-5.9126	97.4093	-4.40035	-14.0638	-4.814	-18.2053	-12.5108
CLK3	1.12782	-10.2709	22.009	-1.24153	-5.07901	16.7693	0.46875	-0.46875	-8.91648	-0.752909	0.9375	5.9375	0.46875	-9.53125	0.790514	-6.65914	-15.0113	-2.14447	0	16.4062	-3.0474	-11.851	-0.0684463	-14.5598	-13.6569
COT	-7.39901	-1.50473	7.03261	17.85	10.7145	8.82974	8.66107	-0.48608	-2.92694	11.9481	-5.56783	-14.5824	-0.220946	2.2964	-0.2331	-2.42367	-4.1617	-3.65639	5.83297	1.0675	8.03712	6.21555	12.7698	-2.52962	4.33897
CRIK	5.36585	-10.9338	72.5177	-9.98818	-11.8794	-2.73733	9.5613	20.5849	-14.2435	7.28014	26.3217	6.4117	6.74916	-15.8904	-2.09945	60.5792	-17.9078	7.62411	-0.674916	7.56303	-14.9527	-11.4066	-4.2516	-2.18676	-5.96927
CSK	3.32779	15.3493	83.9154	60.2022	9.28309	98.4721	103.754	4.26621	-6.70956	-3.28495	13.3106	-1.53584	1.87713	77.9545	11.6046	101.746	28.0331	-0.827206	11.9454	10.8581	-1.5625	1.01103	-2.82659	68.1066	75.6434
CTK	4.11449						10.7636	22.11			19.4677	19.5648	-0.699437	7.33831	4.69357				16.4368	27.9361
DAPK1	1.22075	-3.11419	-4.95963	-10.2653	-4.03691	-0.539568	-0.134409	1.07527	-14.6482	9.53237	7.25806	1.20968	-5.77957	-11.0915	0.316206	-2.42215	-11.4187	71.1649	-3.49462	94.6848	-8.41984	-2.88351	-5.93525	-9.11188	-0.11534
DCAMKL2	88.5587	9.86412	-2.31505	-2.61701	49.2199	18.9379	2.07039	4.7619	-5.63664	-2.00401	2.38095	6.8323	6.72878	-17.1913	-2.7163	-3.72421	-6.13991	64.2174	9.73085	12.0419	-3.92552	-0.503271	-2.40481	-5.23402	-3.5229
DDR1	28.3372	80.4598	97.0115	101.609	97.1648	96.258	100.968	92.9332	-2.75862	-1.19427	98.0639	97.8703	33.1075	103.084	96.9871	100.69	100.843	63.295	100.097	95.5605	-5.36398	6.7433	-1.99045	100.077	51.6475
DDR2	11.3303	60.8757	95.904	99.435	88.1356	100.459	101	42.625	0	0.101989	58.5	93.375	83.125	101.657	96.3357	101.412	101.695	48.5876	100	93.2973	-3.81356	-0.706215	0.611933	101.13	68.7853
DLK	4.01648	34.7711	77.3829	35.7714	86.1094	-9.6409	19.6559	-1.89247	-4.84578	-10.6442	-1.37634	-24.9462	-3.44086	1.42905	39.575	84.4228	-13.059	-0.310928	-9.33333	91.234	-5.9575	-24.4372	-2.85088	19.6794	7.99613
DYRK1A	20.3529	-11.9679	-12.4614	-5.18199	-12.5848	15.9079	9.24658	19.6918	-11.351	4.23139	16.4384	2.22603	3.25342	-6.52174	0.142653	-13.8186	-14.8057	-4.81184	7.70548	76.8041	-2.96114	-12.3381	-1.23192	-11.2276	-17.7668
DYRK1B	15.534	-8.83945	-5.11124	-5.23151	-3.06675	28.5949	7.24191	-28.1972	-7.87733	4.7567	14.0216	3.85208	2.92758	-7.5817	-3.05732	2.10463	-7.39627	7.87733	7.70416	50.241	-11.365	-4.63019	3.33516	-2.70595	-1.74384
DYRK2	22.56	2.23765	11.9599	17.0525	9.64506	5.96886	11.5314	44.6494	-9.64506	-1.29758	29.428	12.6384	9.9631	28.1176	-0.992063	28.1636	1.92901	-9.79938	23.2472	58.6207	-3.62654	-8.56481	-0.0865052	-8.87346	1.00309
DYRK3	28.7222	4.42679	11.9183	3.97276	13.6209	-5.67901	2.92599	21.6867	-10.8967	25.8025	35.9725	-0.516351	-2.23752	-1.08696	-4.53767	49.7162	14.6425	-9.1941	12.5645	42.3581	-0.45403	-7.83201	-9.87654	-4.99432	4.76731
EEF2K	-2.72989	-6.37509	-7.11638	-4.74426	-4.596	-2.42857	2.80899	-0.224719	-14.2328	-3.42857	1.23596	-1.91011	-2.58427	6.33562	-2.977	-4.15122	-10.9711	-6.07858	-0.11236	12.7764	-5.78206	-4.29948	-3.42857	-9.78503	-5.04077
EGFR	102.184	4.91196	100	53.6608	6.39481	18.3126	102.251	102.133	-2.87303	-1.82167	105.687	3.5545	103.318	16.8081	16.8588	97.2196	11.5848	-0.278035	5.33175	9.05707	-0.834106	3.05839	-0.0958773	99.0732	6.95088
EGFR(d746-750)	102.769	-1.01614	100.12	51.4644	1.9725	-1.84211			-3.88524	-2.15789						98.9241	11.6557	-1.13568			-2.92887	0.657501	-2.57895	99.5218	2.80932
EGFR(d746-750/T790M)	97.3333	-0.990099	92.4092	42.5743	7.92079	6.41373			-4.9505	6.23306						81.1881	3.63036	1.32013			-0.330033	4.29043	1.71635	85.4785	4.62046
EGFR(L858R)	102.332	0.36075	99.4949	29.5094	1.51515	15.0342	100.542	101.627	-6.27706	-3.34093	105.063	99.0958	102.351	29.8246	35.6275	94.8773	2.23665	-4.11255	2.16998	17.3482	-3.39105	-0.21645	-3.34093	100.072	0.505051
EGFR(L861Q)	102.641	4.96732	100.828	46.4488	-1.22004	8.76416	98.0188	101.251	-4.79303	-3.15116	100.521	1.45985	102.294	10.7404	12.7858	98.1264	5.83878	-3.2244	-0.938478	3.02398	-1.83007	2.35294	-4.52979	100.479	5.05447
EGFR(T790M)	100	-6.99029	86.9903	32.233	-6.86084	-1.04371	9.63855	9.89673	-12.0388	-3.00065	58.5198	-1.63511	30.9811	7.54258	4.84848	75.9871	-7.37864	-8.28479	6.97074	0.783972	-9.32039	-7.50809	-1.56556	86.2136	-5.56634
EGFR(T790M/L858R)	102.156	1.14094	93.7584	29.0604	2.88591	3.25581	19.1781	61.7684	-5.03356	-4.18605	64.1345	-2.73973	31.2578	21.0461	43.1851	48.5235	1.67785	-0.33557	-2.86426	22.0423	-2.75168	1.67785	-6.51163	66.7785	5.03356
EML4-ALK	7.89766	30.3309	54.1054	17.3407	99.9387	-1.10723	-5.08721	25.5814	-3.6152	-4.95338	1.88953	-6.25	-4.21512	-12.3547	27.4397	4.35049	-7.04657	64.1544	-1.16279	88.2267	-6.67892	-1.77696	-2.50583	19.9142	-1.53186
EPHA1	70.4846	15.9961	3.0422	84.2983	96.9578	44.4683	101.004	28.2309	-10.4024	0.429646	73.2748	8.90841	6.27353	61.2745	53.94	97.4485	54.5633	43.0815	45.5458	62.8261	-15.211	-10.6968	-1.61117	99.4112	-8.83219
EPHA2	2.33546	9.58512	98.5694	98.2833	86.1707	6.77966	99.388	17.7479	-4.14878	-7.01344	19.4614	6.24235	1.22399	94.6319	15.4516	101.907	87.6013	28.1831	57.2827	35.4673	-5.5794	-1.38293	-8.53302	85.8846	0.715308
EPHA3	3.23488	-15.2463	67.0439	97.2703	18.5752	18.2648	100.124	14.6221	-19.9068	-7.30594	10.7807	2.72615	0.371747	87.1835	10.3687	101.931	80.4927	2.06391	56.2577	39.8017	-20.972	-16.3116	-6.13177	56.5246	-7.5233
EPHA4	18.5417	-0.55336	86.2451	96.996	58.1028	12.087	98.9424	32.0799	-2.6087	-6.17391	51.3514	4.93537	-0.822562	90.6203	21.966	101.107	91.6206	12.0949	64.9824	53.9629	-4.50593	-1.97628	-5.30435	88.6166	-1.97628
EPHA5	20.5412	7.17201	89.0379	99.4169	70.8455	29.8413	100.93	37.8486	-1.69096	-3.42857	58.8313	32.4037	6.1089	92.7944	31.8	101.866	97.3178	18.3673	82.3373	66.0563	-3.79009	0.174927	-2.66667	88.9213	14.2857
EPHA6	97.6744	51.1236	101.561	100.437	99.9376	88.0322	39.3319	69.2888	2.18477	5.81835	84.9138	12.5	20.3664	30.3621	23.7237	103.184	103.308	-1.06117	87.2845	90.2632	0.436954	-1.06117	-2.5071	102.559	37.3908
EPHA7	28.9062	16.6267	14.2286	98.9608	74.8201	12.9918	8.58164	46.2455	-4.15667	-4.82554	48.6293	8.46246	6.55542	19.0202	12.4493	100.879	84.0927	7.51399	63.1704	71.164	-5.7554	-2.07834	-4.82554	80.7354	-0.639488
EPHA8	23.75	14.9892	99.2965	98.4307	81.5476	34.7558	100	32.5275	-3.62554	-9.60135	54.0659	38.5714	4.50549	98.3029	42.8298	100.054	95.184	0.378788	75.1648	43.5396	-6.54762	-5.24892	-8.36609	97.5649	7.19697
EPHB1	32.1492	28.9703	97.9639	94.9389	92.7283	11.7495	100.149	22.2883	-0.232693	-7.23047	41.4562	6.98366	-0.742942	71.7504	27.4238	100.175	75.7417	30.8319	36.2556	89.6124	-1.86155	0.465387	-8.00516	96.1024	-1.62885
EPHB2	33.4286	-2.11429	95.4857	96.2857	56.8571	-3.3761	99.8929	22.591	-7.02857	-7.42741	45.5032	14.1328	4.60385	84.5205	15.767	102	84.0571	5.54286	46.8951	81.0409	-5.65714	-3.02857	-8.23768	95.9429	-2.11429
EPHB3	-9.54955	-1.87553	40.0682	84.9105	4.77408	3.09033	99.5441	4.86322	-4.77408	-3.88273	8.96657	9.11854	5.0152	92.1986	-0.529101	101.279	22.1654	2.72805	10.6383	12.8237	-13.1287	-0.341006	-5.46751	8.18414	2.04604
EPHB4	28.4689	3.35019	96.397	96.2705	83.1226	8.49624	100.247	32.7565	-4.48799	-5.33835	62.9172	-2.34858	-0.865266	91.2117	15.7623	100.569	80.2149	0.5689	47.3424	76.4005	-9.16561	-2.46523	-3.38346	97.2819	3.72946
Erk1	2.9734	-2.504	1.11881	-1.33191	-2.07778	-1.6226	-4.63872	0.356824	-0.905701	-3.0649	-2.85459	-5.17395	-3.83586	3.21101	-3.79085	-1.75812	-2.07778	-2.29089	-4.90633	1.02564	0.372936	-1.43847	-1.14183	-1.54502	0.0532765
Erk2	-4.52489	-7.43565	-4.19447	-7.72164	-4.57579	-7.99159	-7.43872	-2.02874	-7.43565	-6.83491	-6.25528	-7.77684	-7.35418	1.49254	-0.636267	-6.95901	-5.05243	-5.6244	-9.21386	5.84927	-6.19638	-6.10105	-4.94217	-4.00381	-4.57579
Erk5	-9.86717	6.28248	3.3538	-2.03118	45.3	0.144161	5.00774	21.4249	-2.50354	-3.31571	18.7403	16.6753	-0.800207	-3.64254	15.6298	3.44828	15.9188	5.81011	0.490449	21.9957	-4.7709	-0.70855	-2.54685	9.0222	0.70855
FAK	-1.2605	-1.74699	21.988	9.6988	90.4217	13.2458	16.5611	38.0995	-3.91566	-3.94089	27.6471	28.9593	9.86425	3.25048	46.25	-22.8313	-1.14458	-1.0241	24.8416	92.2934	-5.48193	-5.36145	-2.40832	-2.10843	-3.55422
FER	2.82486	14.9931	88.7208	89.1334	89.9587	21.6974	16.1523	4.42387	-0.137552	-2.95203	5.96708	1.95473	2.88066	-19.4313	81.1141	88.8583	-2.06327	33.0124	9.36214	92.5373	-3.85144	3.57634	4.28044	2.47593	10.8666
FES	0.948992	0.246508	88.0033	38.7017	86.3599	2.29244	7.38162	8.49582	-2.38291	-3.77943	8.49582	3.48189	5.1532	-18.7273	68.0798	84.5522	-0.246508	3.04026	-2.22841	70.6294	-4.68365	-0.739523	-1.54895	-3.69762	18.1594
FGFR1	-0.189394	97.8176	78.7997	16.1341	17.2253	10.2899	47.4576	24.1525	-8.18394	-0.144928	7.30932	-1.48305	-0.635593	-28.6145	91.133	100.935	96.4147	24.0842	78.3898	92.5478	-6.46921	13.6399	-1.44928	87.2175	20.8106
FGFR1(V561M)	0.253165	87.5767	25.7669	-2.45399	25.7669	-0.282486			-11.9632	2.35405						98.4663	27.454	50			-9.04908	52.1472	-3.29567	4.29448	5.3681
FGFR2	5.11727	99.6185	95.3678	31.7166	27.139	4.2095	73.2899	57.7633	-9.70027	-1.76211	13.1379	2.71444	0.434311	-67.1958	96.9828	100.49	102.67	28.5559	91.3138	96.6357	-9.15531	17.3297	-2.64317	102.561	10.1362
FGFR3	5.24899	98.1859	82.7664	8.39002	42.8571	4.27258	34.0959	63.1808	-9.14588	-2.00108	13.0719	1.41612	0.326797	-11.2738	90.5325	101.209	96.6742	15.4951	76.4706	97.0504	-5.21542	4.61073	-5.67875	94.709	14.7392
FGFR3(K650E)	8.47458	98	92.1818	25.8182	51.6364	5.05338	53.527	79.668	-4.54545	-0.640569	28.2158	2.48963	0.414938	-36.5455	87.0277	100.727	99.4545	16.1818	93.5685	96.3696	-2.54545	11.0909	-1.06762	98.7273	6.54545
FGFR3(K650M)	13.0856	96.3814	96.3814	9.67293	60.7516	6.79775	61.6523	87.053	2.71399	-0.617978	36.9914	2.7127	1.23305	-20.7055	89.9471	100.139	100.974	15.5184	92.2318	96.8354	0.626305	12.1781	-0.168539	100.418	7.8636
FGFR4	1.35593	49.8462	2.66667	8.20513	0	19.2623	9.37866	6.21336	-7.58974	-4.5082	3.39977	7.50293	0.820633	-7.46055	65.4846	97.641	32.8205	6.15385	18.5229	54.5455	-4.51282	2.87179	-3.14208	31.1795	4.92308
FGFR4(N535K)	20.2479	37.7168	30.2023	38.8728	6.50289	7.96875			9.39306	0.15625						98.6994	62.2832	4.47977			9.10405	2.74566	-5.46875	81.3584	8.81503
FGFR4(V550E)	-0.259403	-4.17163	-3.4565	-3.93325	-0.357569	-4.98931			-4.41001	-2.85103						-1.78784	-0.11919	4.88677			-0.11919	-0.834327	-3.27869	-0.357569	1.78784
FGFR4(V550L)	0.260417	3.82452	-7.1991	-1.34983	0.449944	-1.08275			-9.89876	2.22045e-14						20.2475	3.37458	15.748			-8.54893	2.02475	-0.154679	-4.72441	0.449944
FGR	39.3211	89.357	92.4612	93.7916	69.697	81.8693	102.976	29.2857	0.960828	-4.70836	47.0238	27.9762	10	54.9572	85.5573	100.591	56.0976	9.97783	31.0714	93.797	-3.0303	-0.221729	-9.06535	86.2528	93.4959
FLT1	5.60748	101.555	96.5311	99.1627	52.512	61.9663	38.7685	70.2395	-2.63158	-0.730337	14.1391	4.78905	2.16648	31.6103	100.098	100.957	102.273	10.8852	99.2018	97.8425	-1.91388	8.49282	-2.75281	101.794	24.5215
FLT3	33.7727	71.6901	76.6197	90.5634	55.2113	40.6498	16.5367	90.9516	2.25352	22.2662	57.8783	68.1747	-3.74415	60.4909	81.2608	99.2958	68.0282	17.7465	100.312	100.363	5.07042	8.87324	20.3645	90.2817	10.2817
FLT4	10.2459	101.511	91.9591	99.8538	48.0019	84.8293	30.5585	74.6048	-0.438596	5.60976	18.7566	3.16122	-2.21286	17.1852	99.3197	100.926	103.558	36.4035	96.9442	98.9559	-0.925926	18.8596	1.5122	103.655	24.0253
FMS	7.9063	88.1218	93.467	54.4172	91.8337	14.7776	100.124	11.9107	-2.30141	-3.01291	7.69231	22.4566	-5.45906	52.459	52.9412	100.594	92.4276	68.3742	89.0819	90.7861	-1.41054	6.31032	-4.16069	78.0252	6.16184
FRK	54.6952	7.87172	93.7804	100.583	26.3362	81.39	100.146	40.9956	1.26336	-3.0888	60.1757	8.63836	0.585652	70.3593	87.632	99.6113	89.5044	7.28863	82.4305	87.2848	-10.7872	0.0971817	-2.93436	79.3975	62.0991
FYN	19.8547	39.4432	94.8956	90.7193	41.9954	94.4664	100.107	33.7272	-0.928074	8.49802	24.0602	29.6455	1.28894	58.6806	81.4404	100.696	54.9884	11.3689	16.8636	88.2353	-1.39211	32.9466	9.28854	88.1671	81.2065
GSK3α	-0.543478	10.5895	9.44184	-9.96348	-2.55608	29.1572	-6.18893	-3.90879	-13.8237	0.911162	-5.75461	-8.57763	-8.36048	-0.490998	6.4978	-2.34742	37.0892	8.71153	-4.66884	33.7398	-13.5107	6.83359	1.59453	-5.37298	25.0913
GSK3β	1.5544	9.42356	-3.70927	-3.50877	-2.10526	2.48125	-8.97616	-4.62833	-5.81454	-7.78996	-6.31136	-13.885	-9.81767	10.1108	7.69944	-4.11028	10.6266	10.2256	-12.763	23.0139	-7.61905	1.10276	-15.4068	-3.70927	8.02005
Haspin	1.24138	-8.4154	-9.1316	8.0573	7.16204	9.16745	-13.0037	-7.87546	-0.358102	72.217	-5.86081	-0.3663	3.2967	2.5641	-0.746269	4.47628	-8.0573	-6.62489	-5.31136	18.1319	2.86482	-0.537153	4.86436	-3.76007	-3.04387
HCK	42.1133	26.3701	89.1183	95.3137	25.8936	57.0517	99.6344	25.777	-2.70056	-2.14742	44.3327	13.0713	-0.365631	73.1792	67.2532	97.5377	58.7768	8.73709	18.3729	89.6262	3.49484	0.158856	-2.84388	89.7538	30.0238
HER2	100.264	-4.82143	87.6786	10.1786	-0.714286	50.3699	21.3948	13.5689	-2.5	0.678175	40.7068	6.78447	85.3897	4.24594	1.06785	87.8571	6.42857	-3.75	4.73335	7.97982	-0.178571	-0.178571	-5.36375	66.6071	1.96429
HER4	103.987	4.31472	102.03	23.0964	-17.5127	23.1873	103.418	97.3254	-6.9797	-0.226586	103.863	51.7088	101.932	72.77	16.1235	100.635	3.80711	-1.90355	0.445765	26.1164	-5.45685	6.85279	2.34139	93.2741	11.1675
HGK	6.8836	74.7264	100.498	20.995	7.06468	7.3508	78.0534	50.1908	0.895522	-1.81951	41.7939	18.8931	0.954198	3.98278	49.6545	92.1393	52.7363	1.09453	21.1832	95.6044	-0.298507	-2.78607	-3.71179	68.7562	26.1692
HIPK1	0.718133	-6.53266	3.31658	31.2563	-6.93467	70.4409	2.63692	11.9675	-6.13065	-3.30661	5.47667	14.1988	5.67951	14.2539	10.4628	22.2111	46.7337	2.91457	33.8742	78.7778	-0.100503	-7.53769	-3.70741	-7.9397	-4.72362
HIPK2	-1.00756	-11.299	-4.99616	59.7233	-6.53344	42.4149	5.97561	9.63415	-5.91852	-1.85759	12.0732	11.2195	1.46341	16.1981	5.50847	36.3566	78.4781	9.30054	56.3415	95.174	0.538048	-7.91699	0.154799	-10.5304	-5.14988
HIPK3	1.25589	-10.0983	-3.66399	67.471	-5.98749	64.9406	6.38298	10.1655	-8.31099	-0.764007	9.92908	4.72813	0.236407	11.6732	3.04054	27.0777	88.2038	2.05541	85.5792	88.7029	0.625559	-7.59607	0.0848896	-10.992	-5.98749
HIPK4	79.3852	-2.62295	86.9945	100.546	31.4754	92.2136	-1.66359	36.9686	-6.3388	-0.778643	82.8096	51.756	8.87246	36.5989	22.293	95.5191	100.328	3.06011	102.957	92.2366	2.18579	-5.90164	2.78087	20.3279	-0.437158
IGF1R	-2.86832	-1.17241	14.8276	10.8276	79.931	-4.96215	5.52885	6.85096	-3.24138	-12.868	5.76923	2.40385	3.72596	-11.0774	19.2436	17.3103	-1.72414	1.31034	4.80769	63.6508	-4.62069	0.206897	-9.8402	-1.72414	10.1379
IKKα	8.74704	8.7656	1.66436	-1.88627	-1.77531	3.01495	-9.81818	-5.09091	-3.21775	7.7424	-9.45455	-9.81818	-8.72727	1.26582	-1.6835	26.6852	-0.332871	-2.49653	-7.63636	0.813008	1.38696	-3.6061	2.62904	-4.3828	-1.88627
IKKβ	-4.02477	-3.74401	-5.74663	-2.35089	-4.78886	3.7062	4.5208	11.0307	-3.04745	3.7062	4.33996	2.35081	0.904159	-1.78042	0.626959	46.4084	-4.61471	2.26382	1.62749	1.44928	-4.44057	-4.00522	0.74124	-4.52764	-3.30866
IKKε	-0.102041	10.0798	4.39122	-7.58483	7.48503	15.0147	1.73565	5.20694	-9.58084	-1.76644	3.87183	-5.20694	-4.93992	-2.78689	0	-9.28144	-7.08583	14.7705	-3.60481	24.6002	-11.1776	-5.48902	-3.63101	-6.48703	-9.18164
INSR	-3.95722	0.97629	65.1325	34.728	84.2399	7.51055	1.9979	3.99579	-3.76569	-11.3924	2.62881	-0.946372	-1.26183	-8.07087	21.7538	42.9568	-2.7894	0.83682	1.57729	86.6343	-4.1841	-0.97629	-30.2954	3.62622	17.4338
IRAK1	63.772	30.9385	12.0626	13.5472	92.3383	-47.8539	2.74725	-1.64835	12.0626	3.42466	61.8132	18.956	3.02198	7.95107	8.04124	79.4008	15.7211	49.6554	3.2967	90.3485	13.07	7.44963	5.75342	46.1029	10.1007
IRAK4	5.68445	-2.50298	26.6985	-4.05244	7.9857	-4.6811	1.41343	2.94464	-6.07867	-4.6811	15.7833	-1.17786	-2.00236	-28.7091	-0.621891	29.3206	1.07271	-3.69487	-1.53121	47.6071	-5.36353	-3.69487	-5.03218	82.7175	-4.29082
IRR	0.540541	-0.808081	56.5657	65.8586	96.1616	10.3448	-16.1408	-12.1359	0.808081	0.149925	-14.5631	-16.9903	-4.12621	-0.716561	16.1923	54.5455	-4.0404	0.40404	-22.6942	85.6109	-12.5253	-4.0404	1.34933	-3.23232	21.4141
ITK	12.515	37.0944	13.4956	16.0029	62.6106	48.8	1.6568	6.50888	-3.61357	-8.97778	1.42012	-1.53846	-1.89349	-0.451467	28.0206	85.6195	2.43363	29.8673	-6.62722	95.2475	-1.69617	-3.90855	-7.55556	19.8378	3.0236
JAK1	-1.80412	2.57353	-2.08333	-1.59314	46.6912	5.70265	9.01468	7.75681	-7.23039	-1.42566	4.61216	-1.25786	-2.93501	13.3401	9.3318	98.8971	30.5147	100.613	12.7883	13.4933	-7.23039	98.8971	-1.83299	-3.30882	45.9559
JAK2	3.62401	65.7618	63.9889	28.9751	98.1163	54.5117	68.1773	35.5665	6.8144	3.23779	4.92611	-0.295567	-1.57635	18.6962	50.0514	92.2438	32.5208	102.105	9.35961	57.7935	0.277008	101.108	1.75159	0.941828	18.2271
JAK3	3.85852	75.1813	66.9621	2.33683	76.7929	22.4422	50.5405	55.2703	-4.43191	4.45545	3.91892	-4.32432	-5.94595	2.14541	37.582	97.9049	31.1845	103.223	10.1351	34.8712	-2.0145	101.128	5.77558	2.33683	9.58904
JNK1	-4.7259	-2.67472	2.50216	-2.84728	0.431406	-1.12254	16.0877	1.67995	-5.0906	-5.42563	20.672	25.5979	-5.8656	35.7729	35.8615	-6.12597	-1.46678	-3.01984	5.35308	-26.7751	-3.71009	-0.776531	-4.67727	-0.603969	1.46678
JNK2	-2.67459	-1.57928	-2.71636	3.85344	-2.59002	-0.946832	9.02729	12.8062	-5.36955	-4.87983	47.9356	22.8132	-8.04759	9.45468	24.4147	74.3525	56.9172	-5.74858	23.8978	-14.4862	-4.6115	-3.47442	-4.73416	-4.10613	-0.0631712
JNK3	-4.31034	3.82114	0.406504	-2.03252	-1.86992	5.59242	5.21312	21.9258	-4.30894	-4.07583	28.4575	19.9632	10.5796	38.6208	34.5124	8.21138	4.95935	-3.00813	13.2168	14.3889	-1.21951	-2.03252	-2.36967	-0.406504	2.84553
KDR	13.2472	95.7736	101.218	101.074	36.1748	34.5916	21.7486	74.2077	-6.37536	1.78449	30.8197	6.66667	3.1694	22.2857	100.103	94.4842	102.65	6.51862	99.0164	98.1993	-6.94842	15.5444	-0.549073	103.367	13.1089
KIT	1.31291	99.2529	23.2657	96.905	16.4354	58.6111	99.8283	32.3889	-10.032	-0.648148	36.3168	96.716	9.20798	95.7187	95.4963	101.174	100.32	2.98826	97.7892	98.2303	-8.11099	3.6286	-0.648148	78.5486	57.6307
KIT(D816V)	9.27487	58.4942	78.1853	23.166	21.0425	9.18033	100	32.0138	-4.44015	4.7541	27.3666	12.5645	-2.92599	42.8571	86.6995	90.3475	39.9614	35.7143	42.8571	98.2788	-2.12355	16.9884	-3.93443	92.471	16.9884
KIT(T670I)	8.2	96.0751	7.33788	99.8294	63.6519	1.70455	4.66321	13.601	-2.55973	0.568182	7.77202	2.84974	0	17.6166	68.0851	98.1229	100.853	-0.511945	76.0363	80.7429	-4.26621	2.55973	-3.125	31.57	5.2901
KIT(V560G)	1.02302	96.383	7.23404	95.7447	0.851064	55.9936	103.069	16.9312	-5.74468	0.321802	23.0688	100.106	2.32804	23.9726	101.163	100.213	99.1489	-6.80851	100.952	98.4875	-5.10638	-1.06383	0.965406	67.6596	31.7021
KIT(V654A)	0.892857	98.5007	7.64618	96.5517	-3.74813	-3.16947	97.8723	1.65485	-3.52423	-3.8163	-1.41844	16.7849	-3.30969	18.5579	87.2636	96.2519	65.3673	-10.4948	85.8156	99.5272	-4.64768	-4.49775	-1.61708	6.5967	-1.7991
LATS2	1.46199	-5.08772	27.7193	-5.61404	-6.14035	0.569569	-6.88576	-7.66823	-13.1579	21.725	-4.06886	-10.0156	-7.98122	-71.6745	-0.465116	16.4912	-9.47368	37.193	-9.54617	15.18	-4.5614	-1.92982	1.87144	-7.7193	-2.2807
LCK	66.0352	60.6375	100.519	97.8503	98.4433	82.6456	101.798	45.0562	-2.66864	-7.52427	64.6067	80.2247	12.0225	90.1024	73.4982	102.743	85.1001	20.6079	43.2584	97.7825	-2.22387	35.5819	-7.03883	101.26	80.6523
LIMK1	5.00067	46.0461	-7.08931	50.7311	94.1638	99.7496	85.1019	0.0961169	3.28194	-7.00954	-3.69089	-7.20877	-2.32603	-18.2488	59.1869	68.2962	65.7267	59.6801	39.6386	21.0692	-4.94629	5.8266	-1.84275	12.2777	44.7092
LKB1	-1.84768	-3.65211	-5.27395	-3.16912	-1.39475	4.33572	0.734294	1.93092	-8.6566	5.73659	0.897471	7.80528	3.97063	-5.76447	28.1322	-11.541	-5.09601	0.545698	3.04596	10.8315	-6.56702	-5.20786	2.37814	-4.54183	1.13037
LOK	23.9216	93.7267	100.448	96.2659	98.0583	33.0558	52.4571	92.6857	-8.73786	11.4072	80.8	1.71429	16.5714	-17.7202	69.9153	100.896	80.2838	3.51008	56	91.52	-5.00373	2.46453	12.2398	92.0836	-0.970874
LTK	15.7516	29.422	58.5549	60.8671	102.486	2.67152	1.84466	41.2621	-11.7341	-3.76442	20.2913	-0.0970874	4.66019	7.51366	27.23	85.0289	-1.56069	97.1676	-3.00971	81.043	-10.4624	6.41618	-6.92168	65.9538	2.60116
LYNa	49.0251	81.6722	93.4448	99.7324	42.2074	89.8137	100.483	64.1737	-1.2709	-1.61491	68.6369	75.6333	9.2883	85.1175	84.4961	100.134	89.2977	13.311	62.2437	94.2999	-4.48161	11.9732	-1.73913	93.311	72.9766
LYNb	44.5844	78.7988	93.9942	97.178	34.081	85.6989	101.599	59.9147	-1.66425	-3.33333	65.4584	75.9062	7.03625	84.6517	84.6739	103.401	84.877	7.88712	68.9765	92.5358	-10.0579	2.09841	-2.58065	91.2446	62.1563
MAP2K1	-0.300222	5.27816	94.0743	82.4015	0.819292	14.7562	33.9271	26.1806	7.50073	5.302	17.2742	17.9785	20.8368	-8.05119	2.1131	15.1784	-8.56564	11.4821	28.2104	88.64	0.451727	3.52278	98.9448	9.9088	17.5796
MAP2K2	19.6301	9.24497	95.8896	61.2642	13.4886	15.2595	21.1172	8.34168	10.9749	13.2639	7.38978	5.88677	6.01202	-12.351	1.87084	32.8052	16.2472	12.3649	10.1703	92.8602	13.461	6.16178	97.4913	21.691	29.9241
MAP2K3	44.104	7.57977	33.7555	72.2125	11.9493	10.8413	34.832	10.1809	9.88064	-4.06134	2.5323	-13.23	13.4884	94.0718	47.0124	98.6412	89.8336	26.9005	91.2145	9.43571	10.1783	2.02554	3.07811	16.0659	33.6632
MAP2K4	2.84869	3.94298	5.94489	-0.378814	-1.24428	-3.0151	-3.70977	-6.13748	1.54567	-4.98337	-3.57338	-8.83797	0.409165	-4.54325	46.9442	35.979	0.434115	9.7358	-2.3186	48.3452	8.51364	-1.89131	2.18188	-2.76507	33.684
MAP2K5	8.93763	7.1232	63.1305	16.7452	24.4879	70.384	100.271	92.1053	1.34355	13.0463	86.8034	-21.7879	1.62539	-7.56442	12.5733	61.1836	16.639	7.13286	29.4118	96.2367	-1.5141	0.925196	13.3665	42.7473	31.6964
MAP2K6	37.7165	14.5036	43.3957	82.9063	18.8146	1.33689	47.3173	6.21039	13.2365	2.19542	11.5336	-8.40727	9.37896	84.0452	78.3144	98.0732	93.1967	44.4883	92.4799	75.331	14.5141	3.35102	-20.6199	18.3503	30.7491
MAP2K7	-1.12498	3.93459	6.78905	9.67358	4.35812	-4.54704	-6.88984	-5.25496	10.686	-3.2646	-5.56637	-34.0599	-4.08719	-23.7671	10.1571	22.961	-2.52866	3.82432	-3.0362	1.82599	10.0119	2.96473	-2.32414	5.36057	1.64902
MAP3K1	7.81201	-2.63929	59.7636	35.5577	28.0607	-40.4861	-52.4297	6.17008	7.04466	1.37432	9.97442	-10.6458	1.75831	-18.1034	37.0783	-9.03495	4.05924	-10.1914	-9.14322	-4.44343	5.81352	-3.35123	99.0087	-7.43013	12.5278
MAP3K2	6.54982	18.4979	92.9923	9.00946	87.9953	71.2233	49.968	14.4594	7.55766	-14.7688	12.2201	-4.57454	5.59821	-25.8311	45.8548	79.4264	19.2253	75.1833	9.50096	64.6018	5.57658	6.01124	0.801168	13.838	20.6239
MAP3K3	13.1199	12.3749	90.684	9.03103	82.5206	6.18058	88.1622	16.551	3.60038	-14.0058	21.6661	-2.37486	4.74973	-21.4694	76.7991	87.7517	8.57188	35.8835	7.96493	76.4682	9.9335	-14.9588	-6.63484	9.0532	7.86257
MAP3K4	-4.7986	27.4134	96.4065	-0.177612	5.22464	18.6371	50.9615	-1.54915	-1.10688	-17.5265	-12.5	-12.2863	1.92308	-18.3333	2.46504	60.4749	-9.05539	-4.17602	2.45726	1.79574	11.0901	-3.73838	6.11592	-10.212	13.9234
MAP3K5	7.56361	3.43995	13.1839	1.71843	1.11465	6.6802	-1.68798	5.11509	2.56371	-14.8849	3.27366	-13.6573	6.03581	-2.27704	17.8647	40.8335	4.87042	6.2173	-1.43223	18.3743	2.79283	3.36564	16.5546	7.7035	12.543
MAP4K2	4.09605	79.7814	98.2392	34.7298	93.7462	8.33932	54.3116	9.37973	-7.16454	4.02588	6.65658	1.21029	10.8926	3.23956	71.1258	99.0893	46.3874	7.16454	29.9546	84.8046	-2.91439	1.57863	4.16966	23.6794	43.2301
MAPKAPK2	-5.9292	4.44288	-20.0987	-17.1368	-16.8547	-13.9743	-0.116279	4.4186	-17.842	-13.3035	3.95349	1.04651	-1.16279	2.55624	-2.44141	-23.3427	-21.2271	-18.2652	0.116279	7.2904	-16.7137	-17.4189	-0.335383	-20.3808	-16.0085
MAPKAPK3	-2.45009	8.5622	-12.1163	-9.04685	-12.601	-11.3469	-2.21828	0.621118	-15.1858	-13.5609	-0.532387	-4.96894	-3.63798	1.9425	-6.15563	-12.601	-14.5396	-12.601	-3.01686	18.3767	-10.8239	-7.59289	-9.31734	-2.10016	11.9548
MAPKAPK5	-2.03528	6.78643	0	-4.92349	-3.19361	-2.64664	0	1.53257	-8.64937	-1.64521	2.93742	-1.78799	-2.68199	-4.26487	-4.04281	-3.59281	-8.78244	-4.52428	-1.53257	9.35162	-8.9155	-6.78643	-2.21745	-0.93147	11.5768
MARK1	-2.94118	85.5164	30.7305	-1.00756	27.33	-14.8688	15.1194	11.229	-0.629723	-9.0379	14.0584	6.6313	8.84173	11.9552	2.19207	-14.9874	-24.1814	64.4836	8.31123	87.4459	-4.91184	41.4358	-17.0554	-14.1058	-8.69018
MARK2	-7.79221	77.9633	58.0968	-3.99429	26.3773	2.85459	14.9606	6.69291	-6.13409	3.21142	16.0105	6.43045	10.105	0.732064	7.86219	-13.5225	2.17028	57.7629	6.56168	81.8432	-6.27675	41.4023	-5.8876	-9.18197	-0.166945
MARK3	-1.6934	73.4962	65.2646	-3.0303	41.2935	4.08982	9.20666	8.71694	-4.20624	13.3119	11.2635	3.23213	3.42801	10.9111	4.44856	5.92492	-3.48259	81.185	1.46915	85.9137	-0.85934	55.5857	-3.2077	3.93487	-0.226142
MARK4	0.91047	67.7932	62.4254	-9.04393	51.4911	-27.3081	26.4846	13.8955	-26.8734	-20.5053	15.677	8.4323	9.61995	12.404	8.75217	-2.58449	-15.7058	53.2803	11.4014	91.5084	-25.5814	52.2863	-14.6744	2.38569	3.77734
MELK	5.74586	10.9329	65.2406	53.8324	5.46643	82.2146	0.371058	2.69017	-3.32739	24.7918	2.78293	4.45269	-3.71058	22.7462	-0.664767	85.7992	-4.51575	33.5116	0.927644	94.9513	-1.6637	3.20856	-0.587947	1.18835	3.92157
MER	8.41837	72.4052	65.4192	100.25	100.549	-0.876339	3.85542	10.3614	-4.24152	-2.3369	8.6747	5.3012	6.0241	-46.1871	33.9056	74.002	28.7924	-0.748503	20.3614	98.4828	-3.24351	0.948104	-6.62123	44.7605	6.03792
MET	16.3758	36.0772	10.0965	100.772	100	26.723	2.58137	13.0191	-3.92283	-3.96619	13.6925	-5.05051	0	-8.65007	35.3022	16.7846	2.12219	-3.53698	2.3569	28.4922	-4.56592	-1.22186	-2.40572	7.65273	3.66559
MET(Y1235D)	20.3733	20.4368	14.3526	100.156	99.22	24.5526	2.79823	21.5022	-5.14821	-2.64853	22.2386	0.441826	1.91458	-4.56081	33.2406	12.9485	-1.71607	-0.936037	-0.736377	32.9049	-6.39626	1.40406	-1.50322	4.52418	2.4961
MGC42105	-1.11821	-12.9159	31.5068	-7.63209	-6.26223	-8.54403	-0.56338	3.94366	-4.10959	3.31299	0.704225	-1.40845	-4.50704	-48.489	0.318471	-5.67515	-21.5264	-12.7202	0.985915	23.3496	-10.7632	-9.00196	1.39494	-16.6341	-7.63209
MINK	0.517464	49.3554	100.307	-2.08717	0	-0.771704	39.9535	18.8153	-7.48926	-1.41479	14.7503	3.25203	-0.58072	3.08989	34.7407	79.558	23.9411	-5.77041	5.8072	94.5409	-4.05157	-1.35052	-1.80064	23.8183	9.82198
MLK1	10.6601	17.4753	93.3314	19.9623	2.82066	96.0561	64.076	14.3975	5.15961	3.31264	9.22561	6.42997	6.68158	-11.7913	90.2164	28.9582	-7.13871	52.5189	1.34191	81.0263	7.47824	2.14452	16.1553	42.3593	9.95647
MLK2	20.742	7.52909	58.4901	6.66579	4.70003	46.7086	14.3065	-1.74736	3.98548	-9.78161	30.6152	4.55042	1.78376	-1.70213	18.1409	38.9608	0.794762	21.7036	0.509647	-1.70394	9.05154	4.6767	4.99779	11.5335	4.98294
MLK3	12.1659	28.701	90.7571	21.2315	0.876807	96.4531	62.0785	18.0871	0.719042	-3.14822	6.6217	5.79399	4.69037	-12.1902	74.3028	33.2519	-4.41741	43.2821	7.51073	93.9626	-1.86587	2.39984	1.58528	27.3509	1.49876
MNK1	70.1107	35.5699	-4.3654	10.5093	0	19.9802	4.15842	74.2574	-0.485044	15.0346	98.8119	5.34653	11.0891	-1.25628	-1.93548	30.3961	6.9523	8.56912	36.6337	34.854	-19.0784	-1.61681	-2.96736	90.5416	23.2821
MNK2	55.7769	16.3216	-2.07029	97.0149	2.07029	69.4051	1.82556	35.497	1.87771	11.5014	69.574	-4.25963	2.43408	2.08333	2.27273	97.4964	72.8455	53.9721	39.3509	14.6919	-13.6254	3.70727	-10.9348	66.6827	27.3953
MOS	-1.91403	5.50685	43.5038	41.8174	1.25114	-12.4667	9.51165	3.63868	3.2968	-23.9196	0	1.9151	4.30897	-3.63868	-12.1935	1.586	0.398782	7.61948	-2.64922	14.6824	-1.43379	3.93607	41.9832	8.7793	10.2801
MRCKα	-3.04487	-3.44828	30.2682	0.574713	-7.66284	-1.83746	1.86625	-6.06532	-5.9387	-2.54417	1.39969	-5.59876	-2.48834	-13.1462	-2.16535	-0.574713	-4.78927	0.766284	-6.53188	1.48883	-1.53257	-0.574713	-0.565371	-6.13027	0.383142
MRCKβ	0.320171	2.457	65.6511	-2.9484	-1.9656	-2.8463	-1.52526	-3.90848	0.687961	2.65655	0.476644	-5.05243	-5.05243	-9.62822	1.14537	1.17936	-17.0025	19.7543	-6.10105	-4.9571	-4.02948	1.08108	-2.56167	-16.1179	-5.11057
MSK1	3.50665	3.58744	0.128123	-2.04997	-0.640615	0.0758725	6.98487	9.42957	-2.04997	37.4052	6.75204	6.86845	7.21769	2.47813	0.900901	74.4395	1.02498	37.2838	7.68335	55.8036	0	8.96861	-0.531108	-0.384369	0.256246
MSK2	-2.1097	-2.7408	-2.27095	-3.52388	-1.8011	-2.72152	2.38501	4.94037	-6.81284	15.2532	2.04429	2.04429	2.04429	2.54777	1.44928	27.0164	2.42756	4.6202	0.681431	38.3246	-5.24667	-2.7408	-4.74684	-3.21065	-1.01801
MSSK1	1.18906	6.01266	-10.1899	31.8354	-1.70886	2.54925	-4.62725	-5.01285	-7.02532	-5.56199	-2.44216	-4.62725	-3.08483	-17.0951	-1.92572	17.2785	42.8481	6.13924	52.0566	1.41388	-8.16456	-5.75949	-4.86674	-4.36709	-6.64557
MST1	-1.44144	76.9517	97.7695	5.76208	83.4572	2.38298	3.19149	-1.06383	-1.85874	10.2128	-2.92553	-1.19681	-5.58511	-20.6946	1.983	30.1115	-5.39033	12.2677	-8.1117	91.5775	-2.41636	3.71747	-3.74468	3.15985	51.3011
MST2	-2.10918	39.7643	80.4591	-0.310174	12.5931	-0.793167	2.70541	7.21443	-2.29529	1.76937	-1.90381	-1.2024	-0.701403	-7.88288	1.98265	1.05459	-6.38958	2.91563	2.00401	53.0834	-3.41191	3.28784	-2.8676	-3.90819	24.1315
MST3	1.80033	7.05544	99.2081	0.431965	11.3751	0.532319	19.6311	3.68906	0.287977	-1.29278	10.6719	-0.790514	-1.84453	0.797448	-4.47958	22.8942	-6.62347	-1.15191	-2.37154	70.3652	-3.59971	-1.58387	1.74905	6.76746	-1.72786
MST4	-3.96175	2.81775	98.741	-1.73861	0.539568	-6.81955	13.7004	7.29834	-5.57554	0.18105	5.50576	2.1767	1.66453	1.7673	-3.22906	7.2542	3.66032	-3.05755	-1.02433	33.9174	-3.41727	-2.21823	-2.23295	-2.21823	-4.61631
MUSK	4	81.0837	58.0798	94.962	98.9544	15.7895	8.19209	12.4294	-7.31939	1.96078	8.75706	9.60452	4.37853	42.0108	9.25325	100.285	80.3232	56.1787	91.6667	98.7342	-8.8403	1.04563	-0.928793	42.4905	-0.285171
NDR1	-2.98643	-2.01058	-3.49206	-5.39683	-1.48148	-0.890648	-1.84783	3.47826	-6.87831	17.714	1.19565	-0.76087	-0.543478	-3.00261	2.49042	49.2063	-9.10053	88.1481	-0.76087	8.92495	-4.55026	21.7989	-1.68234	-8.78307	-3.80952
NDR2	-0.959488	-1.99488	-4.24552	-6.18926	-4.75703	-2.05545	-5.92992	-6.19946	-8.13299	24.9044	-5.66038	-7.14286	-5.79515	-14.4205	2.36128	57.0332	-8.5422	89.4629	-7.54717	-1.75202	-3.63171	23.7852	-1.48184	-8.95141	-2.50639
NEK1	0.426743	-4.35866	56.538	-4.23412	2.24159	24.4019	5.86466	5.11278	-7.09838	-6.3568	7.06767	0.150376	1.50376	-23.2114	2.40674	78.0822	-6.84932	-3.98506	5.71429	-0.607533	-7.97011	-3.11333	-4.85304	-7.84558	-2.73973
NEK2	-3.20733	-6.39795	87.2681	-0.383877	-2.68714	16.1654	5.37037	-0.555556	-7.29367	-1.00251	3.14815	-4.62963	-3.7037	-18.5185	27.095	1.40755	-6.65387	-3.96673	-2.59259	14.0071	-5.11836	-2.43122	2.75689	-7.42163	-1.02367
NEK4	-0.612557	-3.7422	84.4075	16.0776	4.5738	4.15309	1.16732	0.77821	0.831601	-1.87296	-6.48508	-9.33852	0.648508	-21.9196	12.261	98.1289	-4.0194	-5.95981	-8.69001	-6.87419	0.4158	-5.68261	2.03583	-6.51421	-0.4158
NEK6	0	-5.48961	-5.88526	-3.21464	-2.72008	-3.01205	2.96736	1.92878	-6.37982	-2.45598	2.37389	-2.22552	-4.30267	0.963391	-3.09936	-10.4352	-6.47873	-5.98417	-0.148368	4.95315	-3.31355	-1.13749	-0.324374	-4.30267	-1.43422
NEK7	-4.03023	-5.15239	-10.5225	-5.87808	-5.29753	2.28385	-6.69643	0.892857	-10.6676	-1.52257	-9.22619	-1.93452	-0.744048	-3.77095	-4.7482	-9.94194	-13.135	-1.81422	-11.1607	5.64516	-7.61974	-1.23367	1.63132	-5.87808	-3.55588
NEK9	0.932836	32.7301	-4.24862	1.25885	57.1204	101.233	2.88184	6.77233	-10.5429	-3.15068	3.17003	4.61095	3.31412	-21.0526	3.58974	17.3092	2.5177	7.71046	-1.58501	6.21622	-8.33989	-2.83242	-3.0137	-7.08104	-2.20299
NPM1-ALK	13.7168	34.0824	66.4419	10.1124	100.449	-3.08686	-7.5	18.9062	-5.61798	-3.23044	-3.125	-10.3125	-3.28125	-63.75	20.7965	5.46816	-7.1161	64.6442	-8.59375	88.125	-7.56554	-3.37079	-1.79469	27.9401	-1.72285
NuaK1	-1.55211	89.6217	83.6081	6.98351	99.1271	6.97464	1.69287	11.8501	4.2677	43.75	12.8174	12.3337	3.14389	-17.272	72.9478	5.04365	-1.74588	54.8982	-1.69287	96.5622	3.29777	39.3792	-0.634058	16.2949	4.07371
NuaK2	-3.35821	88.3848	87.1143	1.63339	86.9328	4.52708	3.0504	-0.530504	-0.725953	20.0485	8.88594	-1.59151	-1.19363	-43.7666	2.81481	-12.7042	-24.1379	41.3793	-2.51989	68.0371	-5.44465	57.1688	9.21584	-14.1561	4.35572
p38α	46.4986	1.4233	8.80337	37.3748	-2.26674	-0.741133	91.2322	-0.473934	-4.2699	-7.0937	31.6351	-2.48815	-2.96209	92.459	10.2349	100.843	93.8851	-2.16131	84.7156	-1.30152	-4.90248	-3.00474	-3.91742	18.0812	9.75224
p38β	3.38681	-2.09455	-0.299222	32.8546	0.299222	5.29891	62.9435	-3.81078	-4.48833	-2.17391	1.70828	-10.6439	-10.1183	96.1972	17.8125	100.598	97.7259	-0.777977	82.3916	-2.15633	-2.09455	-1.49611	2.30978	7.0018	23.7582
p38γ	-2.72727	-5.08475	-6.08175	23.2303	-4.18744	0.310752	1.3245	4.50331	-7.07876	1.67806	2.64901	0.264901	-1.19205	-14.6497	-4.92021	85.6431	15.8524	-2.39282	3.44371	4.56693	-5.48355	-2.79163	0.683654	-3.78863	-0.299103
p38δ	-1.39276	1.01523	-5.07614	46.5159	-3.41486	-3.42548	0.798722	5.91054	-8.95247	-4.38702	3.03514	4.47284	5.43131	-9.95671	-0.585652	20.3046	2.21504	0.0922935	13.4185	-2.625	-5.6299	-2.49192	-2.70433	0.0922935	8.39871
p70S6K	7.32484	12.0198	43.4944	7.80669	40.2726	10.51	10.6912	10.1382	-13.259	37.558	11.6129	1.93548	8.1106	1.93548	16.6667	101.487	91.8216	20.1983	52.7189	88.0079	-12.5155	12.5155	-1.39104	59.1078	9.29368
p70S6Kβ	3.42205	0.469484	1.17371	-3.52113	5.86854	-0.55371	4.04412	12.7757	-10.5634	36.6556	8.73162	5.51471	7.72059	-3.698	1.68856	77.6995	1.40845	11.0329	5.14706	15.1549	-6.80751	0.234742	-0.996678	2.58216	0.234742
PAK1	0	-6.52667	58.9671	-2.55392	-4.02951	-0.270453	4.37666	6.36605	-5.3916	-2.16362	10.4775	5.96817	1.85676	-159.172	-0.493827	-6.07264	-8.00227	-5.61862	3.31565	6.09137	-3.8025	-4.48354	-1.35227	-5.27809	-4.93757
PAK2	8.92857	-3.10881	85.4922	-5.44041	4.92228	-9.7931	0.25413	4.95553	-7.77202	-15.5862	3.55781	12.1982	6.98856	-39.8291	3.51351	9.84456	-1.29534	3.36788	-4.7014	13.5286	-1.81347	-20.7254	-8.68966	-2.07254	12.9534
PAK3							-1.28205	-4.2735			4.2735	-5.12821	4.2735	-3.9886	5.9949				-5.27066	0.14245
PAK4	-13.1285	17.3053	2.71941	-12.979	-5.56242	10.62	-4.93827	-4.01235	-4.07911	-11.3567	-5.8642	-5.14403	-4.21811	-21.1934	1.67526	-5.43881	-15.3276	0.370828	-6.99588	6.58436	-19.0358	-17.3053	-0.675261	-10.5068	-7.04574
PAK5	-1.78571	20.8868	16.5064	-2.51068	6.89103	21.267	4.52617	-0.141443	-1.86966	-6.60633	2.82885	-1.69731	-0.565771	3.39463	2.04678	-0.480769	-8.17308	13.9423	-1.9802	35.0778	-6.14316	-1.44231	-2.62443	-3.25855	-1.22863
PAK6	6.44567	-10.3237	-0.349956	-4.19948	3.14961	8.74126	2.1645	5.19481	-1.22485	8.27506	2.886	-2.1645	0.1443	-101.975	5.53892	-2.97463	-7.69904	2.97463	-0.721501	16.0622	-6.47419	-3.14961	8.04196	-5.42432	-6.99913
PASK	2.73349	-2.35183	-0.0940734	-2.16369	1.03481	1.12465	-7.21649	-9.07216	-9.31326	2.2493	-4.94845	-11.3402	-4.94845	-2.89673	-2.41379	25.4939	0.28222	0.470367	-7.83505	2.39112	-8.18438	-1.4111	-0.187441	-4.2333	2.35183
PBK	-3.14136	-13.9726	-24.3836	-4.29224	-14.3379	12.3907	1.87225	4.29515	-10.137	-2.33236	3.96476	-2.7533	5.837	-7.80669	-5.04587	-13.79	-29.1324	-18.5388	2.7533	2.65152	-8.6758	-12.3288	-3.79009	-21.0959	-11.7808
PDGFRα	37.0079	102.158	76.8345	99.8561	48.6331	62.7178	99.55	52.1152	1.15108	16.0279	54.0054	98.4698	40.234	102.705	98.8679	102.734	102.158	35.3957	99.73	98.2424	3.45324	23.8849	4.52962	101.295	86.6187
PDGFRα(T674I)	48.1153	92.9368	57.4969	97.3978	95.1673	17.866	5.11034	93.8444	0.247831	20.8437	78.8618	14.7503	18.4669	45.2381	79.4819	99.1326	92.4411	17.1004	92.7991	98.1308	-2.72615	24.7831	-0.248139	91.202	1.48699
PDGFRα(V561D)	27.2251	101.266	64.1953	99.0958	29.8373	50.6655	101.501	55.9345	-5.96745	9.31677	64.5293	100.273	-0.95498	99.7271	97.9381	102.532	101.447	18.0832	101.091	101.228	-3.9783	10.3074	2.21828	100.362	55.6962
PDGFRβ	34.1892	101.25	94.5455	83.9773	17.6136	32.3024	99.354	55.814	-3.52273	12.0275	56.8475	91.2145	2.84238	93.2157	95.7126	102.273	102.5	26.25	98.4496	98.7821	-2.27273	20.4545	3.43643	88.6364	33.4091
PDHK2	-2.75862	-4.82986	-3.29308	-1.53677	-3.51262	0.108342	-0.412088	-4.12088	4.17124	-0.108342	-2.06044	-1.92308	-4.94505	0.549451	-4.2328	-0.219539	7.02525	-3.9517	-2.33516	4.25824	-2.19539	-2.19539	-0.541712	0.219539	3.73216
PDHK4	-3.27869	-6.34409	-13.6559	3.76344	-3.76344	-1.03093	-6.23583	-8.84354	2.04301	4.74227	-2.83447	-5.55556	-4.30839	-4.30839	-1.02916	-1.39785	-1.6129	-5.91398	-6.34921	1.47392	-1.82796	-3.33333	-1.64948	-1.82796	-1.39785
PDK1	-1.39104	-5.84677	-4.6371	-7.19086	-5.17473	-5.38244	-1.27389	2.86624	-9.07258	-2.83286	0.796178	-0.159236	-2.70701	-4.33071	-0.284495	-5.04032	-2.88978	-3.1586	-2.54777	18.5484	-8.26613	-5.71237	-5.52408	-4.36828	-4.09946
PEK	12.3525	0.872961	11.3485	78.8881	1.10269	99.4226	0.579151	1.35135	5.28371	-7.40359	0.579151	-2.50965	-0.19305	0.386847	2.38095	64.8748	12.1755	-0.459453	-0.772201	4.32277	7.9026	2.48105	1.13425	4.68642	11.3485
PGK	0.37037	-3.21782	-3.21782	-2.9703	-2.59901	-1.3083	-0.120048	1.68067	-6.43564	44.3117	4.92197	0	-0.960384	-13.2716	-3.07125	-0.866337	-6.68317	13.8614	0.840336	11.4841	-5.56931	3.83663	-1.3083	-3.58911	-4.33168
PHKG1	30.7292	0.391389	48.9237	52.7071	2.73973	-0.590319	1.69811	5.09434	0.521853	2.5974	44.1509	8.67925	4.71698	-8.12918	1.52174	4.82714	7.95825	50.3588	15.283	95.1825	1.56556	1.30463	-2.24321	68.2322	-0.913242
PHKG2	42.803	13.5163	-2.7439	-0.304878	10.4675	1.97917	-1.21131	4.17227	-7.62195	3.85417	8.07537	3.63392	0.269179	-9.1024	0.986436	5.18293	-7.62195	18.1911	-2.5572	93.875	-7.21545	-2.94715	2.8125	19.2073	-4.36992
PIK3CA/PIK3R1	23.0179	17.0707	36.6667	47.9798	18.6869	4.41558	13.9344	11.4754	22.3232	-7.35931	-4.37158	-3.55191	-8.74317	16.1202	44.948	44.5455	41.1111	42.1212	-7.9235	4.58115	22.3232	34.2424	0.25974	22.8814	24.1525
PIM1	0.970874	-0.957956	-7.45077	-10.2182	-7.23789	3.59598	-3.00601	6.31263	-9.04737	3.06716	16.5331	8.61723	0.601202	7.71757	-1.49083	16.8175	-9.36668	-7.98297	-3.00601	12.2002	-8.19585	-9.04737	4.44209	-8.72805	-3.40607
PIM2	2.62329	-2.20143	-11.7777	-11.8877	-5.28343	0.23753	5.08906	8.77863	-7.04458	-1.66271	10.8142	6.2341	0.254453	7.15564	-3.84139	3.41222	-9.24601	-3.8525	4.07125	10.1947	-5.94386	-7.81508	-3.84798	-6.49422	-1.98129
PIM3	3.03359	-7.43719	-7.33668	0.40201	-4.0201	8.91266	-1.77778	0.333333	-4.0201	3.44623	10	1.11111	-3.44444	12.7778	-4.17778	4.62312	-6.53266	-8.94472	7.44444	21	-1.30653	-3.61809	8.43731	-6.13065	-4.92462
PKACα	0.375469	51.3274	57.9244	-4.66613	-6.27514	-1.90141	0.736377	4.34462	-6.11424	69.7887	5.52283	0	0.662739	3.30789	1.9103	81.4159	-5.47064	48.4312	1.54639	12.9984	-5.79244	8.20595	8.52113	1.28721	-4.02253
PKACβ	-11.1015	30.9123	51.7272	-4.25155	-2.30292	-1.44928	-1.67939	-3.05344	-6.28875	55.0225	-2.59542	-1.22137	-3.05344	28.3969	0.211193	81.2223	-0.531444	38.5297	-0.305344	19.542	-6.02303	7.88308	-5.09745	-0.088574	2.65722
PKACγ	0.750469	-3.35443	53.3544	-2.59494	-6.51899	1.15808			-7.40506	18.066						95.8861	-0.822785	11.3291			-6.01266	-1.83544	1.96873	6.01266	-2.97468
PKCα	-0.928505	-1.34844	53.5599	-8.46818	-8.46818	-7.2549	3.28798	7.93651	-11.165	0.980392	2.04082	2.22045e-14	1.02041	6.54762	5.80645	-3.29018	-10.6257	8.3603	-6.80272	1.44	-6.31068	10.8414	-5.19608	-0.269687	-3.61381
PKCβ1	4.63576	-5.6129	3.67742	1.48387	-2.90323	-5.74495	4.22018	6.23853	29.3548	15.5934	4.58716	0.183486	-5.87156	3.40557	-4.7048	-5.6129	-7.03226	1.35484	-2.75229	0.975976	-2	7.16129	-3.47222	-6	-3.80645
PKCβ2	3.43348	-3.37478	21.6696	-0.17762	-1.59858	-3.08077	5.27211	5.95238	-8.70337	6.74438	3.7415	-1.87075	-5.78231	1.65837	4.54959	-3.73002	-8.70337	4.97336	-3.40136	8.06452	-1.59858	14.032	-1.58201	-2.13144	-3.01954
PKCγ	3.01129	-6.08067	11.9807	-3.91331	-0.662252	-0.38059	1.01215	7.89474	-6.56231	10.0856	0.809717	0.404858	-0.202429	-1.31234	9.34292	-2.95003	-7.646	6.08067	-3.4413	17.4935	-10.7766	0.662252	0.38059	-4.87658	-4.39494
PKCδ	3.49014	-5.38695	62.7466	-0.834598	-1.13809	-5.87762	1.50502	5.18395	-9.78756	18.599	1.50502	-0.501672	-1.67224	-14.0515	-2.99184	50	2.2003	2.04856	0.334448	18.9122	-4.02124	12.3672	-4.7504	-5.38695	-5.08346
PKCε	-2.01536	-7.49453	-0.71116	3.00875	-7.1663	4.85437	7.29665	0.598086	-2.78993	-43.0825	3.22967	3.70813	1.07656	-0.566572	-5.38302	11.6521	-7.82276	-2.78993	4.30622	4.71567	4.32166	-4.32166	6.31068	-4.10284	-7.71335
PKCζ	1.02215	9.93485	13.5179	4.20315	8.95765	4.88506	-4.16667	6.7029	5.25394	7.56705	-2.53623	-2.35507	0	5.3152	-0.674157	14.3322	5.21173	-8.79479	-13.4058	2.97521	5.25394	12.8664	4.31034	1.30293	12.8664
PKCη	1.20192	-9.54545	1.13636	8.54772	-8.29545	9.4518	2.99296	6.33803	9.12863	34.6881	5.45775	2.8169	2.46479	5.4321	-1.67264	5.45455	-8.63636	-1.36364	1.23239	13.189	7.88382	-11.7045	-7.65595	-9.43182	-21.9318
PKCθ	4.37828	-5.29675	84.1736	-4.27569	-2.87173	-0.775695	11.6638	4.45969	-7.84939	12.5404	5.66038	6.86106	0	-3.49206	-3.4673	0.0638162	-7.4665	-1.46777	-4.45969	15.1448	-2.61646	-1.46777	0.387847	-0.701978	-3.12699
PKCι	2.9549	-16.9207	5.18293	15.2616	-5.18293	14.1714	2.85714	9.23077	3.77907	14.1714	9.23077	-4.17582	-0.659341	-7.88591	0.255428	17.6829	-8.38415	1.52439	0	6.96429	13.3721	-13.872	8.68571	6.09756	-15.7012
PKD1	8.77598	37.3239	76.5845	-11.9718	44.3662	82.8292	-0.568182	13.2102	-12.8521	64.1459	39.0625	6.10795	9.94318	-6.14634	-2.02465	3.34507	36.9718	2.11268	-1.5625	94.6335	-16.5493	21.1268	9.1637	4.22535	43.4859
PKD2	-8.73786	10.4382	71.6335	-10.9163	43.2669	82.4688	-2.73224	17.0765	-17.4502	24.0315	31.694	-8.74317	2.86885	-2.94599	-0.121507	9.48207	-17.6096	-5.81673	-1.36612	92.1233	-15.6972	-6.61355	-3.28299	-19.2032	-12.6693
PKD3	3.15534	8.20569	50	-0.765864	56.1269	93.0693	3.21384	8.28183	-7.54923	37.1287	27.1941	2.47219	4.82077	2.03327	0.350877	18.709	-17.8337	6.45514	2.5958	90.9337	-9.95624	-3.6105	2.47525	-2.29759	-4.7046
PKN1	15.2023	6.66982	32.3084	2.12867	22.7058	-2.84288	11.3065	2.76382	2.6017	54.9696	5.52764	2.51256	0	12.8205	17.4658	1.60833	0.804163	50.473	-0.502513	31.4024	0.709555	91.1069	3.71094	0.946074	-0.37843
PKR	10.5839	-1.71158	-13.4013	-4.29716	6.04516	99.8093	2.87356	22.2222	-8.44865	-4.38627	8.42912	6.51341	-0.191571	0	23.3503	18.5361	-4.47924	-6.19082	-0.191571	29.3478	-13.8383	-7.75674	1.12691	-1.0925	-0.764749
PLK1	0.399467	-3.71462	5.12972	-2.06368	-3.125	-8.61094	-5.41872	-9.72906	0.0589623	-8.48523	-6.65025	-7.38916	-2.70936	-2.40602	1.15453	-5.71934	-0.766509	24.8231	53.4483	4.58422	-0.294811	1.47406	-9.11376	-3.5967	-3.83255
PLK2	14.0464	1.0291	20.9368	4.40028	1.10007	-4.64348	-1.56951	-3.58744	1.38396	7.0087	-0.44843	-3.13901	-3.81166	6.06936	1.23153	-1.17104	-3.22924	10.3265	-0.896861	1.56658	0.567779	-2.12917	-1.65217	-3.01632	-1.84528
PLK3	-3.72671	-3.41131	0.877193	-1.07212	-2.24172	1.84534	9.89523	6.05355	-1.65692	-4.65729	9.42957	15.3667	5.93714	26.4834	9.06516	-10.8187	2.24172	12.768	6.86845	7.61697	-4.38596	-4.97076	-6.59051	-5.75049	-2.82651
PLK4	5.1853						3.66314	9.44514			6.91327	10.8278	-4.47118	21.1276	71.627				3.4297	57.8179
PRKX	-2.10084	3.10613	-4.31406	-2.41588	-7.07506	-1.55109	1.57791	1.97239	-4.48663	86.4051	2.5641	0.394477	0.493097	6.06452	-1.13507	25.7118	-5.522	16.0483	-2.95858	11.237	-1.89819	8.45557	-1.18613	-5.69456	-3.45125
PYK2	-3.08943	24.876	88.944	91.2119	94.8972	56.4901	6.63667	7.76153	1.48831	1.78808	1.34983	3.71204	-0.787402	-62.7246	38.9462	99.0078	-0.496102	67.6825	0.899888	93.683	-3.04748	24.5925	2.71523	5.74061	0.921332
QIK	15.3374	17.3878	100.327	0.408163	38.449	80.1865	100.556	17.9167	-2.85714	3.2634	64.1667	-3.19444	-4.72222	-35.5556	16.5079	50.5306	-5.63265	34.8571	-5.27778	91.6667	-2.85714	10.0408	-4.662	94.9388	5.79592
RAF1	4.59269	2.14334	-3.0062	48.1146	10.7904	99.1046	72.7365	0.534079	13.9225	8.01823	2.31434	51.882	7.93489	57.7662	84.8958	96.3367	96.3797	8.88043	95.7528	-59.5605	-0.647915	9.98587	60.988	40.8862	95.658
RET	18.4061	97.2198	94.9609	98.6099	44.3962	49.1489	73.428	69.574	-3.90964	-4.89362	47.6673	2.12982	-0.30426	31.49	95.435	101.911	101.564	75.6733	98.8844	98.5417	-2.86707	13.6403	-8.01418	101.564	32.2328
RET(G691S)	17.1605	97.424	93.8573	99.5376	41.0172	53.388	76.4434	72.8637	-4.42536	-0.0546448	55.6582	2.54042	-3.00231	12.8176	95.2465	101.915	102.708	74.4386	103.002	102.309	-5.74637	10.6341	-1.47541	101.915	22.9194
RET(M918T)	7.60234	87.006	92.994	96.2275	26.2874	37.3175	52.6564	66.9421	-4.61078	0.216333	47.6978	1.06257	-4.36836	0.118064	86.0075	100.898	101.617	56.7066	103.66	101.653	-3.41317	6.0479	-1.40617	101.856	11.3174
RET(S891A)	28.5151	102.869	90.0273	100.82	88.5246	53.2691	88.016	93.3422	-2.86885	-1.37646	66.1784	10.3862	0.932091	80.8256	99.5726	102.459	102.459	60.6557	103.995	103.595	-2.18579	48.4973	-1.23882	102.322	59.5628
RET(Y791F)	19.6868	97.4533	92.5297	98.472	34.2954	36.4154	71.2308	69.8462	-3.56537	0.995733	55.8462	-0.615385	-4.76923	16.4615	93.7079	101.698	101.528	68.0815	102	100.462	-0.679117	13.4126	-1.70697	102.207	30.3905
ROCK1	2.32558	10.9351	1.43288	1.28205	3.39367	1.24777	3.44828	1.9025	-3.69532	82.8877	1.18906	-2.14031	-2.61593	-16.5207	-1.24309	38.537	10.9351	66.2896	2.85375	8.8	-0.678733	23.0015	3.20856	-0.226244	1.28205
ROCK2	2.33838	18.7611	28.4956	15.2212	4.24779	13.5647	1.07198	4.44104	-5.48673	92.7445	3.21593	-2.29709	-1.99081	-27.4172	-0.780379	62.8319	2.65487	87.4336	-8.42266	15.5894	-5.66372	41.0619	2.99685	-0.707965	-0.176991
RON	1.35593	67.4033	60.4052	98.5267	101.105	37.1287	5.08475	7.83898	-6.44567	-6.23762	3.17797	-2.01271	1.16525	-12.6241	12.6566	38.674	3.49908	-5.15654	1.80085	22.4178	-3.13076	4.05157	-6.43564	28.5451	-2.02578
ROS	9.3674	93.5811	2.77027	96.4189	101.689	8.54962	5.33808	8.54093	-0.608108	4.27481	16.3701	15.6584	5.4567	-0.679348	93.6324	57.9054	4.7973	54.1216	1.54211	44.4965	-2.09459	4.12162	-0.610687	47.7703	1.95946
RSK1	3.125	48.9661	21.1745	-7.60959	-4.96278	7.98548	6.78175	8.75462	-13.0687	14.3376	12.947	1.60296	2.5894	21.9153	15.6489	31.5964	0.165426	1.48883	-1.35635	95.4933	-6.45161	1.48883	-9.80036	-1.48883	-1.32341
RSK2	0.81367	46.1505	40.5829	-3.61027	0.217486	-0.44953	7.09343	6.40138	-1.34841	37.8831	8.04498	0.0865052	-1.03806	13.354	9.4451	29.7956	6.65507	9.2649	6.14187	96.2659	-2.74032	2.56633	-1.75725	5.69813	-2.30535
RSK3	4.48319	55.7528	66.6903	0.355114	3.33807	3.06905	10.6415	8.75472	-9.30398	42.1142	29.5094	2.33962	5.43396	10.6533	6.86901	61.5767	44.5312	9.44602	13.9623	96.9183	-2.91193	9.30398	-4.77408	9.16193	-0.497159
RSK4	5.9719	43.9506	43.0617	-3.65432	-1.58025	2.20008	3.89937	8.05031	-8.19753	16.3138	22.7673	2.89308	2.38994	10.9777	10.4418	13.4321	-1.18519	3.16049	-1.50943	96	-5.7284	2.66667	0.207555	5.4321	-3.06173
SGK	-1.40228	-5.00305	-5.00305	-1.95241	1.46431	3.85448	5.97015	5.97015	-6.58938	2.81507	1.89055	5.47264	2.48756	9.10165	-1.1236	7.56559	-5.36913	-2.44051	3.38308	60.1852	-3.17267	0.610128	0.216544	-4.51495	-0.122026
SGK2	3.97022	4.31953	-3.37278	-1.47929	-2.30769	-7.57932	5.97826	9.87319	-2.07101	-0.763807	6.52174	1.90217	1.81159	24.0713	-3.44388	11.5385	1.00592	-1.47929	3.44203	26.9006	-2.66272	-0.177515	-6.99177	-2.07101	2.66272
SGK3	-1.03704	-6.03843	-7.13632	-1.0979	-2.92772	0.0853971	1.17509	7.75558	-6.40439	7.25875	2.35018	3.17274	4.58284	15.006	-3.1746	-1.0979	-8.23422	-4.94053	0.470035	9.17085	-3.84263	-0.182983	0.768574	-7.68527	-2.37877
SIK	3.03738	17.6404	100.225	6.17978	25.5056	99.5851	99.1657	7.86651	-5.50562	-0.948429	52.0858	-6.67461	-7.15137	-25.149	19.2478	96.4045	0.674157	22.3596	-5.60191	80.0954	-5.2809	-2.22045e-14	-2.96384	69.7753	24.2697
skMLCK	1.37712	5.33752	71.2716	11.617	1.56986	0.519673	13.1841	18.5323	-8.00628	-1.55902	21.1443	8.83085	2.11443	-14.0136	63.1453	35.6358	6.59341	-4.70958	14.6766	91.1695	-1.72684	-1.88383	-3.34076	13.0298	53.2182
SLK	10.6918	82.006	100.05	51.6633	99.5464	11.5976	46.8992	89.1473	-2.67137	4.49704	72.739	3.87597	9.56072	-40.6932	27.8416	95.4133	29.1835	6.70363	5.81395	92.3611	-3.88105	6.80444	-2.60355	90.1714	42.7923
SPHK1	-2.08681	2.79581	-22.8657	-11.8822	-13.7793	-18.3031	-14.6832	-13.7558	-15.5766	-15.2081	-15.1468	-16.6924	-11.2828	10.8192	1.19363	-20.4693	-14.1787	-14.9775	-4.63679	-12.5193	-14.2786	-8.18772	-11.3661	-13.4798	-11.2831
SPHK2	-10.3535	6.57251	4.39978	2.00978	7.87615	-13.872	-0.391645	-2.21932	1.24932	-20.5044	-4.56919	-0.78329	-4.047	6.13577	4.09357	10.7007	-3.20478	6.24661	-3.00261	-6.91906	2.77023	2.77023	-13.9654	5.70342	7.76752
SRC	22.4852	21.0441	95.9634	92.0883	60.549	68.4297	101.442	46.035	2.63724	-5.07088	35.2214	5.25232	5.87024	22.6	66.6667	102.207	43.972	16.0926	11.8435	83.902	0.914962	6.72766	-5.39804	94.3488	51.507
SRM	0.395257	7.11044	57.6399	99.3949	1.51286	99.5928	99.6988	10.6928	0.151286	-1.2215	2.56024	2.40964	13.4036	26.9646	63.26	101.815	65.5068	4.68986	28.1627	20.3039	-3.93343	-2.42057	-4.15309	39.1831	101.815
SRPK1	5.93855	16.7849	8.73501	36.7262	4.55102	-5.90268	-2.16667	-1.66667	1.68828	-5.37738	-3	-4.5	0.333333	3.11927	8.39286	17.103	27.355	2.39785	8	4.96454	5.84781	2.1287	-0.0691181	3.10741	2.0553
SRPK2	-3.3241	-3.92548	-8.58283	0.199601	-2.32868	11.2903	4.24581	4.46927	-10.3127	-1.36476	3.46369	5.36313	4.46927	-0.604595	-3.92638	-2.99401	4.99002	8.7159	5.02793	15.1839	-3.79242	-1.66334	-0.868486	-8.7159	-2.19561
SYK	11.0915	0.665188	100	-2.99335	62.9712	36.8785	69.1589	17.3832	-2.54989	6.07735	5.04673	16.4486	0	54.2146	39.8656	9.7561	3.54767	20.3991	-10.6542	46.0289	-13.3038	-3.43681	-4.97238	26.7184	-3.7694
TAK1-TAB1	12.0469	2.92874	82.6451	4.3686	5.16512	14.1128	5.29222	5.01611	1.54096	-7.14905	-3.63553	-5.29222	-1.15048	4.82492	-4.33931	97.0958	59.932	5.82991	47.63	95.0788	-3.76815	1.8228	5.47494	6.12708	8.62386
TAOK2	-3.17881	3.38253	9.7786	6.08856	33.2718	33.5829	-2.88154	-7.89755	-0.799508	-2.59217	-7.2572	-1.60085	-5.4429	7.47065	53.1486	74.4772	75.4613	34.6248	88.9007	3.30843	-1.29151	1.78352	-2.59217	-3.50554	5.35055
TBK1	2.92842	34.1093	31.7814	-0.506073	1.417	-1.14894	6.45604	25.5495	-5.26316	-4.80851	25.6868	-7.14286	-14.2857	5.96026	-2.68097	-1.82186	-2.12551	20.6478	-13.0495	55.7531	-2.22672	9.21053	-4.46809	0.910931	-0.809717
TEC	0.632911	-3.81316	58.1506	43.2793	1.52526	38.3945	101.043	20.2683	-3.81316	-7.03174	26.9747	-2.68256	0	-0.143885	48.3108	78.551	-8.19828	18.4938	-1.78838	20.8845	-8.77026	-2.47855	-7.52956	15.2526	-0.190658
TIE2	-3.0743	79.2673	21.59	89.8675	83.3203	81.0573	15.6355	9.44882	-3.66329	-10.4258	0.787402	-0.224972	2.13723	41.2151	25.9292	100.935	46.9992	2.88387	29.2463	21.1672	-8.18394	-0.857366	-6.75477	84.8792	-2.41621
TNIK	2.98686	82.2607	102.163	15.7382	10.7626	14.9791	80.3443	33.7159	-2.97458	4.10042	31.1334	26.1119	25.2511	10.6169	83.3572	96.2142	42.1309	0.811249	25.1076	94.2611	-2.54191	-1.89292	3.09623	66.4684	32.8286
TNK1	22.4168	94.8841	11.4309	88.809	41.1671	100.323	4.31034	43.6207	-0.39968	-0.322581	28.2759	9.31034	-8.44828	-4.13081	41.7219	99.5204	46.9225	30.9353	22.4138	49.6124	-2.95763	87.53	-2.58065	23.2614	13.0296
TRKA	3.61446	94.3891	88.0543	99.638	103.258	83.4838	37.3993	14.3843	-3.52941	-2.43682	7.01956	6.55926	5.63867	40.8654	42.0782	101.086	90.2262	91.6742	63.7514	98.2234	-3.52941	13.3032	-1.17329	46.2443	16.1991
TRKB	0.323625	76.8953	61.9134	98.1949	101.625	85.8586	19.5612	0.182815	-0.541516	-2.66299	-4.7532	-7.67824	-10.4205	55.6777	16.7832	100	74.0072	88.4477	68.0073	95.0509	1.08303	12.4549	-3.39761	25.8123	11.3718
TRKC	3.12891	89.7727	81.6761	97.8693	100.426	80.8968	49.2063	13.3333	-4.82955	-5.34398	7.46032	2.38095	3.96825	68.1579	21.3192	103.409	92.7557	94.4602	91.4286	95.04	-6.53409	3.69318	-7.43243	14.7727	5.25568
TSSK1	10.231	24.8963	29.2116	-1.49378	20.5809	8.0531	-4.66472	3.49854	-6.30705	25.9292	10.4956	0.437318	-3.207	-2.32221	-1.56028	-4.14938	-6.97095	39.1701	-9.62099	85.2778	-7.13693	-1.16183	-5.04425	2.6556	-4.14938
TSSK2	2.02775	-8.1791	-8.65672	0.41791	0.895522	-1.73378	0.595238	1.98413	-10.9254	-0.279642	-2.97619	-3.96825	-7.53968	2.57669	-2.46032	-8.1791	-11.0448	-9.61194	1.19048	26.1406	-0.179104	-9.97015	-1.73378	-9.25373	-10.806
TSSK3	-1.35993	-3.55823	-2.07948	-1.06285	-0.600739	-8.10163	-2.68714	-6.71785	-3.09612	-6.27996	1.91939	-4.03071	0.191939	11.7083	4.41459	-4.66728	-4.39002	-2.91128	2.68714	2.11132	-2.63401	-3.0037	-8.29338	-2.54159	-3.18854
TTK	4.34912	13.325	-15.0177	2.75156	-8.87506	-21.5059	9.36698	6.41574	-2.68262	-10.7284	18.7767	11.9333	0.25663	-8.21918	31.0226	-8.13595	0.185735	2.06223	14.0291	27.8921	-21.5357	2.19244	59.0569	3.10771	-13.574
TXK	38.1429	-0.792864	72.3489	17.6412	38.6521	18.3028	102.448	26.7483	-4.36075	0.998336	41.4336	1.57343	0.699301	15.6391	52.4625	97.5223	-2.18038	10.109	-2.27273	36.67	-7.13578	-1.78394	-4.6589	59.8612	5.15362
TYK2	2.45098	12.4043	-3.36907	-3.67534	20.6738	9.94236	1.2474	-2.7027	-7.19755	5.76369	-2.2869	-7.06861	-10.395	-1.70807	5.31287	65.8499	-3.67534	99.2343	-9.97921	37.764	-6.58499	87.5957	2.16138	-7.04441	6.27871
TYRO3	22.459	21.0267	82.6301	99.2264	92.4754	0.194049	43.1148	20	-2.32068	-1.22898	26.2295	4.7541	12.623	-32.4007	27.383	44.5148	33.9662	-3.02391	18.0328	98.4021	-1.33615	0.492264	-2.65201	93.8819	3.16456
WEE1	10.1258	6.31907	98.3897	5.451	11.6807	0.650694	84.5436	20.1245	7.19079	-0.257968	21.3174	14.3154	8.40249	3.73665	1.01695	2.13918	4.42244	-1.31853	7.05394	37.3243	4.25466	-0.0711238	9.16555	1.72703	-1.63585
WNK1	-6.21387	-2.35669	-4.3949	-1.84713	-2.86624	1.13798	4.45545	1.81518	-4.77707	2.9872	2.47525	-0.660066	-0.825083	-0.879765	-3.66714	2.61146	-4.01274	-3.88535	-0.990099	-1.67364	-4.26752	-3.24841	-1.42248	-2.35669	10
WNK2	-3.77644	-4.43174	4.14582	6.43317	-3.8599	0.685976	19.755	-6.89127	-7.7198	1.44817	-6.43185	-2.90965	-5.0536	-7.81011	3.07467	13.4382	-4.43174	-4.5747	-7.50383	-5.66616	-7.005	-4.86061	1.44817	-4.28878	12.8663
WNK3	-6.95652	-7.74288	12.8561	20.1607	-8.32725	1.33829	37.0079	0.314961	-11.9795	0.446097	-5.51181	1.73228	-1.5748	-6.77165	7.72532	0.73046	-10.0804	-7.88897	-5.82677	-6.14173	-12.71	-8.03506	1.04089	-7.3046	52.5931
YES	49.9274	78.5714	96.9388	89.5044	64.8688	90.7476	101.779	51.3642	0	1.18431	52.5504	21.9454	25.7414	43.6006	68.1627	101.02	62.3907	23.6152	42.4674	99.4798	-7.28863	12.0991	-1.62842	99.5627	74.4898
YES(T348I)	47.9827	91.3661	53.5186	67.0018	93.1402	52.3351			-0.413956	5.93032						96.3335	40.272	4.79007			-0.17741	11.2951	-2.8169	100.355	3.96215
ZAP70	2.36794	-2.75665	75.7605	0.855513	20.8175	3.4662	11.7329	15.1444	-1.9962	-1.90641	5.66787	9.60289	6.11913	2.51716	38.7312	5.22814	-0.475285	2.75665	13.1227	6.99578	-2.75665	0.475285	-3.11958	4.46768	6.17871
